# Supplementary material
Source: publisher figshare collection journal article supplement (https://acs.figshare.com/ndownloader/files/25741962)
Supplement: Supplementary file 1 [file 25741962]

# Use of EpiAlveolar<sup>TM</sup> Lung Model to Predict Fibrotic Potential of Multi-Walled Carbon Nanotubes

Hana Barosova<sup>1</sup>, Anna G. Maione<sup>2</sup>, Dedy Septiadi<sup>1</sup>, Monita Sharma<sup>3</sup>, Laetitia Haeni<sup>1</sup>, Sandor Balog<sup>1</sup>, Olivia O'Connell<sup>2</sup>, George R. Jackson<sup>2</sup>, David Brown<sup>4</sup>, Amy J. Clippinger<sup>3</sup>, Patrick Hayden<sup>2</sup>, Alke Petri-Fink<sup>1,5</sup>, Vicki Stone<sup>4</sup>, Barbara Rothen-Rutishauser<sup>1,\*</sup>

<sup>1</sup> Adolphe Merkle Institute, University of Fribourg, Chemin des Verdiers 4, Fribourg, Switzerland

<sup>2</sup> MatTek Corporation, 200 Homer Ave, Ashland, Massachusetts, USA

<sup>3</sup> PETA International Science Consortium Ltd., 8 All Saints Street, London N1 9RL, UK

<sup>4</sup> Nano-Safety Research Group, Heriot-Watt University, Edinburgh, EH14 4AS, UK

<sup>5</sup> Department of Chemistry, University of Fribourg, Chemin du Musée 9, Fribourg, Switzerland

\*Corresponding Author:

Prof. Barbara Rothen-Rutishauser

Adolphe Merkle Institute, Université de Fribourg, Chemin des Verdiers 4

CH-1700 Fribourg

Phone +41 26 300 95 02

Email: [barbara.rothen@unifr.ch](mailto:barbara.rothen@unifr.ch)

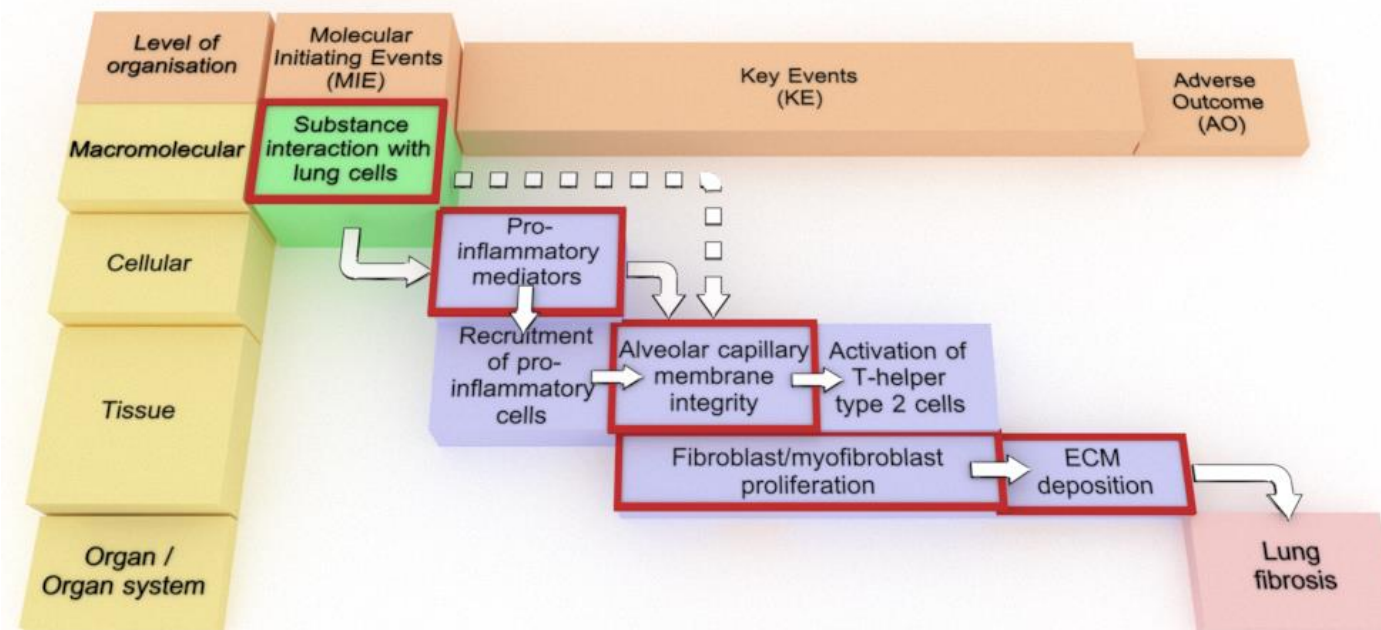

### Supplementary Figure 1

Figure 1: Schematic depicting the adverse outcome pathway (AOP) for pulmonary fibrosis.

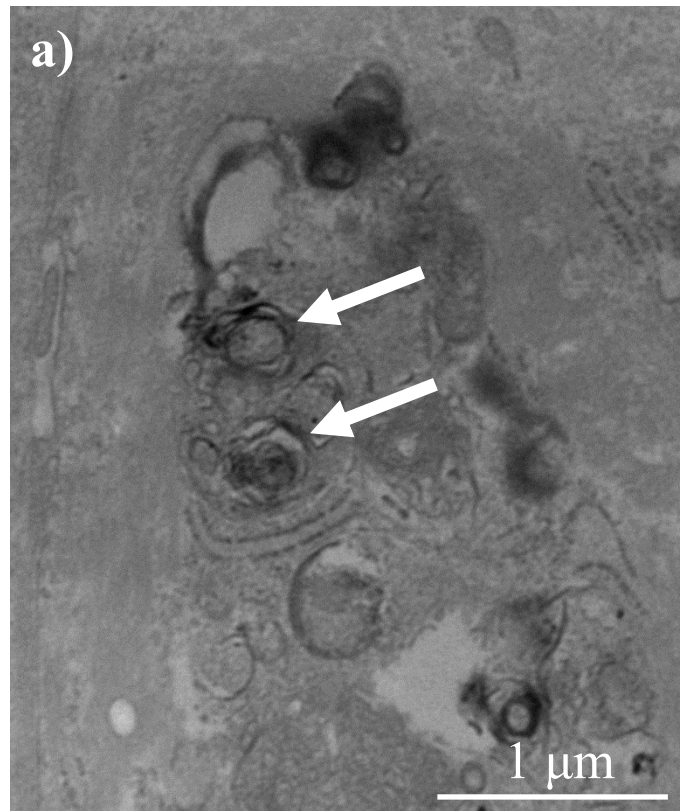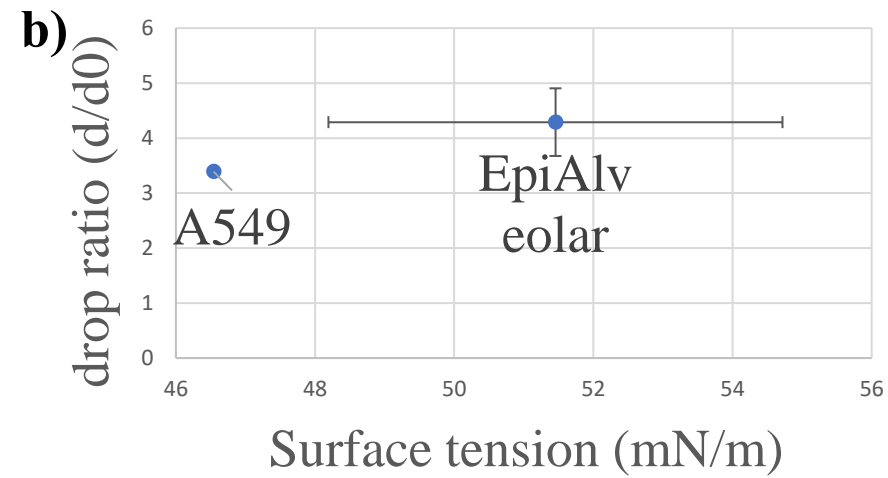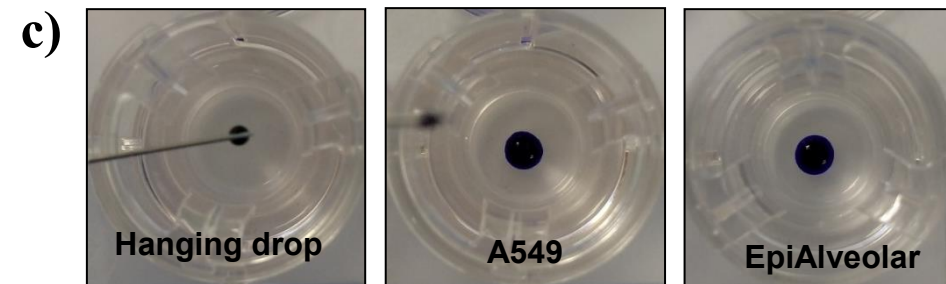

### Supplementary Figure 2

EpiAlveolar characterization: a) Representative Transmission Electron Microscopy micrograph showing a lamellar body (white arrow) present in ATII cells. Data obtained in Laboratory 2. And surface tension investigation, b) the graph showing droplet diameter vs. surface tension, data presented as mean $\pm$ standard deviation for EpiAlveolar (n=3), A549 single value (n=1) and c) droplet diameter before (hanging drop) and after placement on the cell culture surface. B). Data obtained in Laboratory 1.

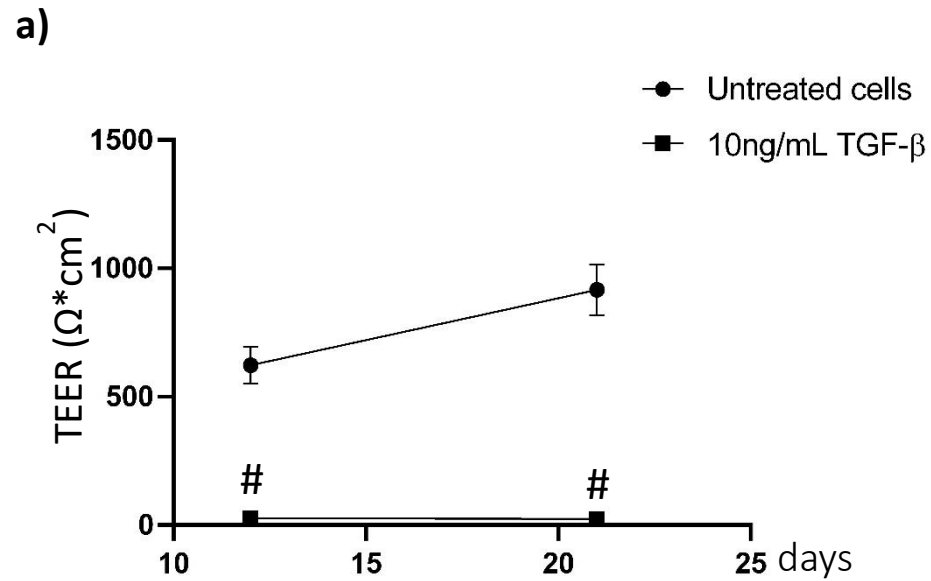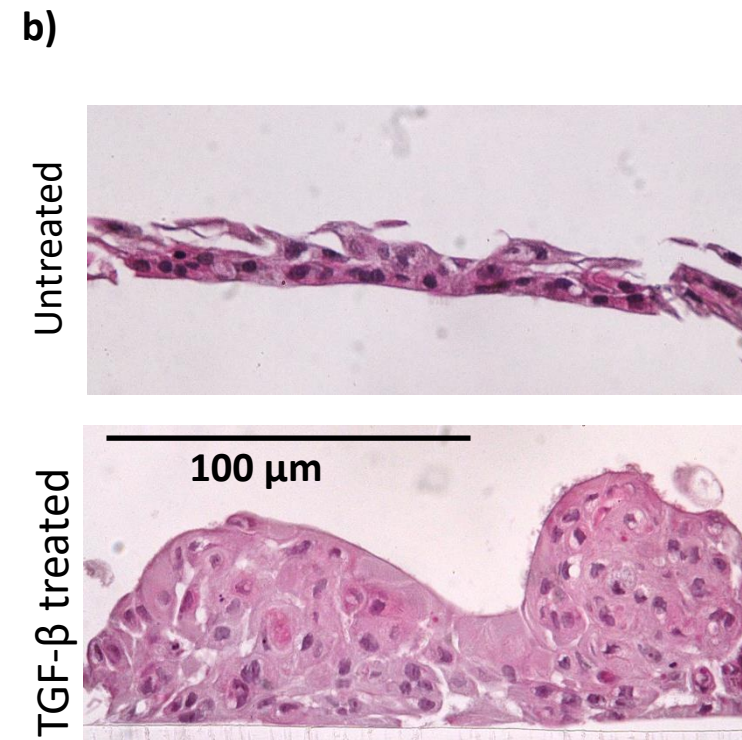

### Supplementary Figure 3

EpiAlveolar response upon TGF- $\beta$  treatment: a) Transepithelial electrical resistance, data presented as mean $\pm$ standard deviation, # marks statistically significant decrease (compared to untreated cells) b) Hematoxylin and eosin staining showing the thickness of the untreated tissues (upper), and nodules formation with tissue contraction upon exposure to TGF- $\beta$  (lower). Scale bar is 100  $\mu\text{m}$ . Data obtained in Laboratory 3.

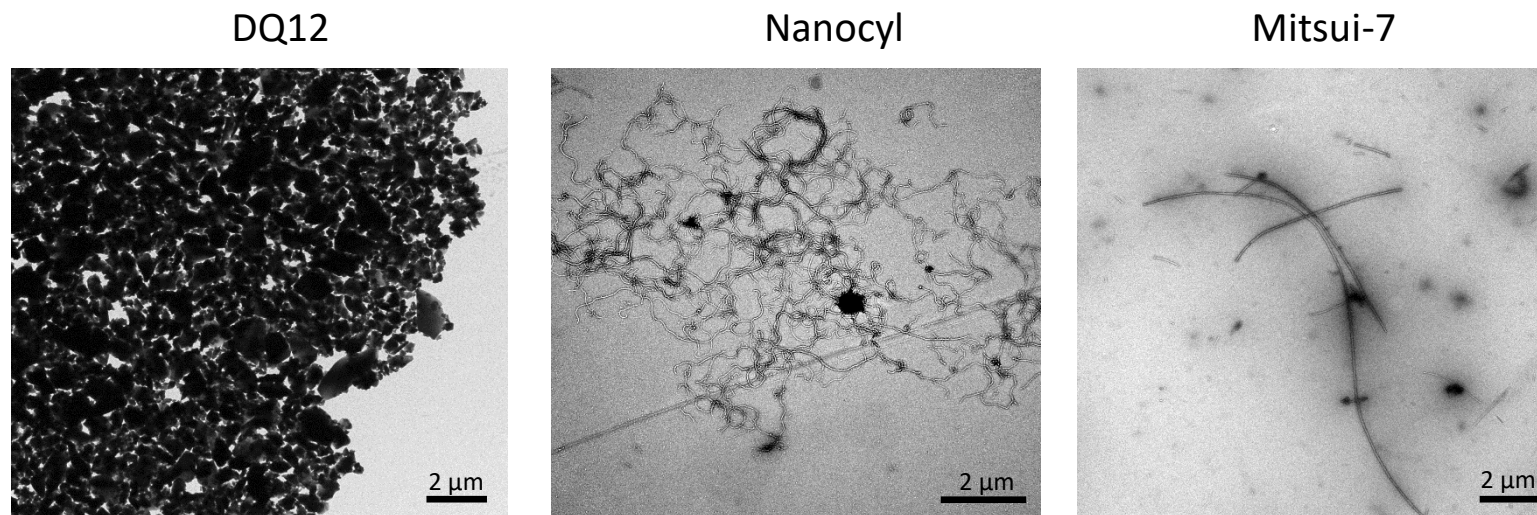

#### Supplementary Figure 4

Representative TEM images of suspended particles prior nebulization. The stock solution of DQ12 (left), Nanocyl (middle) and Mitsui-7 (right) suspended particles was pipetted onto TEM grid. Scale bar is 2  $\mu\text{m}$ . Data obtained in Laboratory 2.

| Material | Daily deposition ( $\mu\text{g}/\text{cm}^2$ ) <sup>ψ</sup> | Weekly deposition ( $\mu\text{g}/\text{cm}^2$ ) <sup>θ</sup> | Total deposition after 21 days ( $\mu\text{g}/\text{cm}^2$ ) <sup>θ</sup> | Dispersant      |
|----------|-------------------------------------------------------------|--------------------------------------------------------------|---------------------------------------------------------------------------|-----------------|
| DQ12     | $0.18 \pm 0.04$                                             | $0.91 \pm 0.22$                                              | $2.72 \pm 0.66$                                                           | Ultrapure water |
| Nanocyl  | $1.02 \pm 0.10$                                             | $5.08 \pm 0.52$                                              | $15.24 \pm 1.56$                                                          | 0.1 % BSA       |
| Mitsui-7 | $0.90 \pm 0.31$                                             | $4.50 \pm 1.56$                                              | $13.50 \pm 4.67$                                                          | 0.1 % BSA       |
|          | $1.98 \pm 0.42$                                             | $9.88 \pm 2.10$                                              | $29.63 \pm 6.30$                                                          |                 |

<sup>ψ</sup> deposition measured by QCM

<sup>θ</sup> deposition calculated based on daily deposition and number of days

#### Supplementary Figure 5

Particle deposition during the experiment presented in ( $\mu\text{g}/\text{cm}^2$ ), data are presented as mean  $\pm$  standard deviation. Data obtained in Laboratory 2.



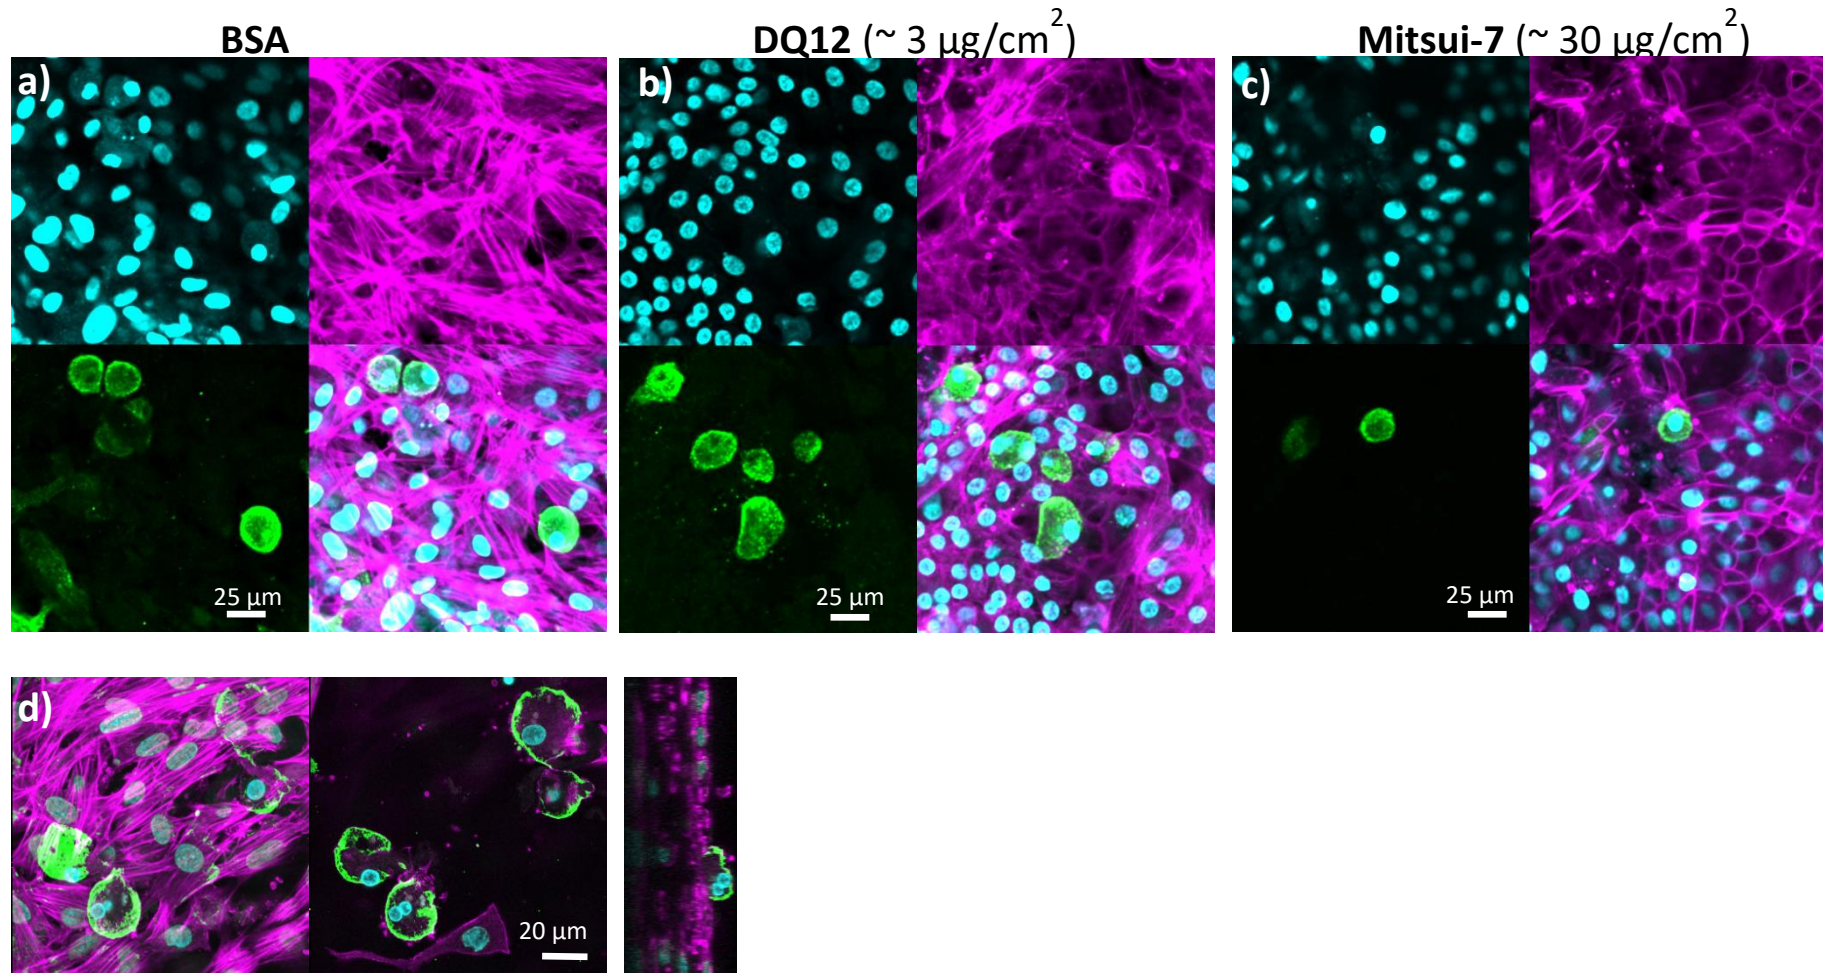

### Supplementary Figure 6

Representative LSM images of (+) MDMs tissues showing the presence of MDMs within the (a) BSA, (b) DQ12, and Mitsui-7 (higher dose) treated tissues at D21. (d) shows that MDMs are located on the top of apical side of the tissue. Magenta represents cytoskeleton, cyan cell nuclei, and green represents macrophages (CD206). Data obtained in Laboratory 2.

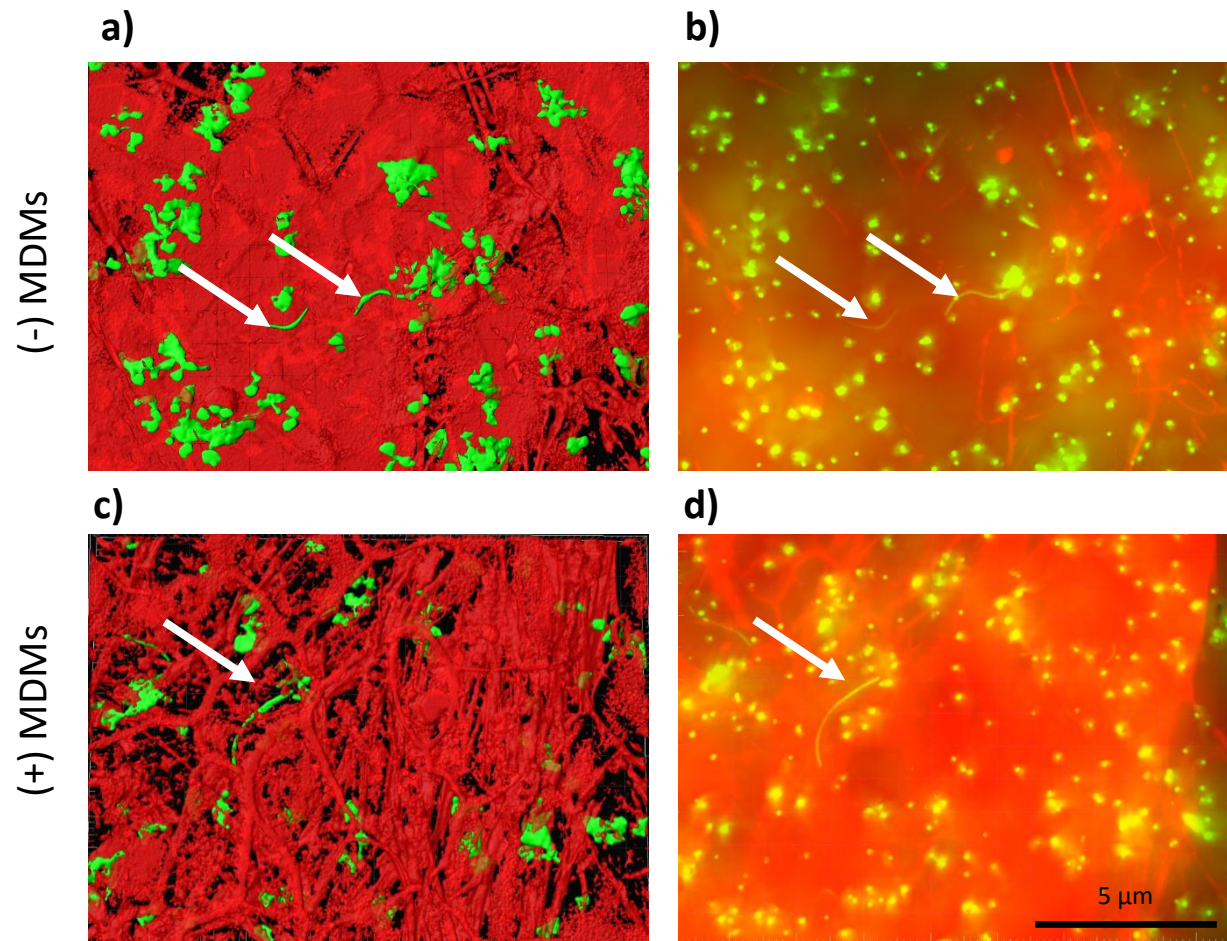

### Supplementary Figure 7

Fluorescence-enhanced dark-field in vitro imaging of Mitsui-7 in EpiAlveolar tissue. Representative images of the (-) MDMs (a, b), and (+) MDMs (c, d) model are presented. In order to visualize the spatial location of MWCNTs within the tissue both 3D rendered (a, c) and as xy projections (b, d) are presented. Red color represents F-actin cytoskeleton, while green color represents Mitsui-7. In addition, as the cells were growing on PET membrane inserts a strong scattering of the insert pores resulted in unspecific signals (round-shaped green objects), and white arrows point to the fiber structures derived from Mitsui-7. Scale bar is 5 μm. Data obtained in Laboratory 2.

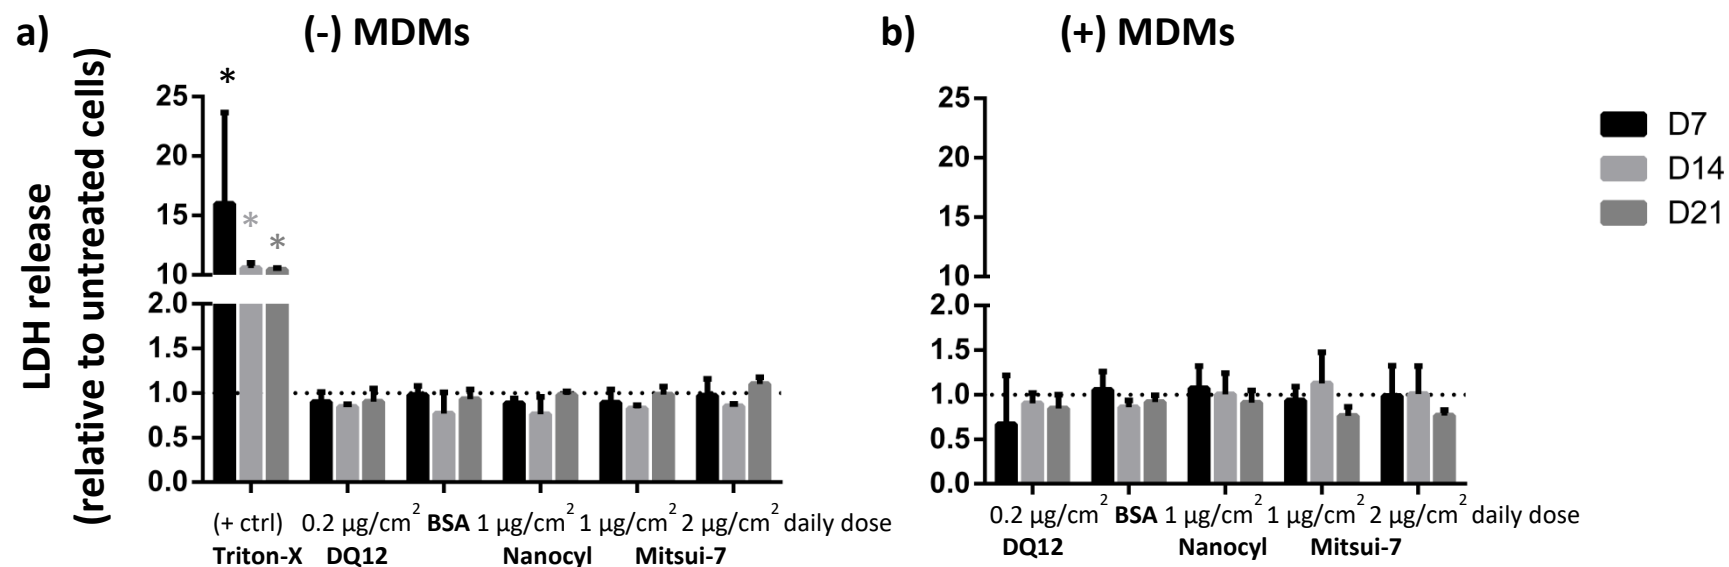

### Supplementary Figure 8

LDH release from co-culture model (a) (-) MDMs and (b) (+) MDMs upon exposure to DQ12, Nanocyl and Mitsui-7 MWCNTs at D7, D14 and D21. Triton-X (0.2%) was used as positive control. Data are presented relative to untreated cells (dash line), mean  $\pm$  standard deviation (SD), n=3. Data marked as (\*) are considered statistically significant ( $p < 0.05$ ) increased compared to untreated cells. Data obtained in Laboratory 2.



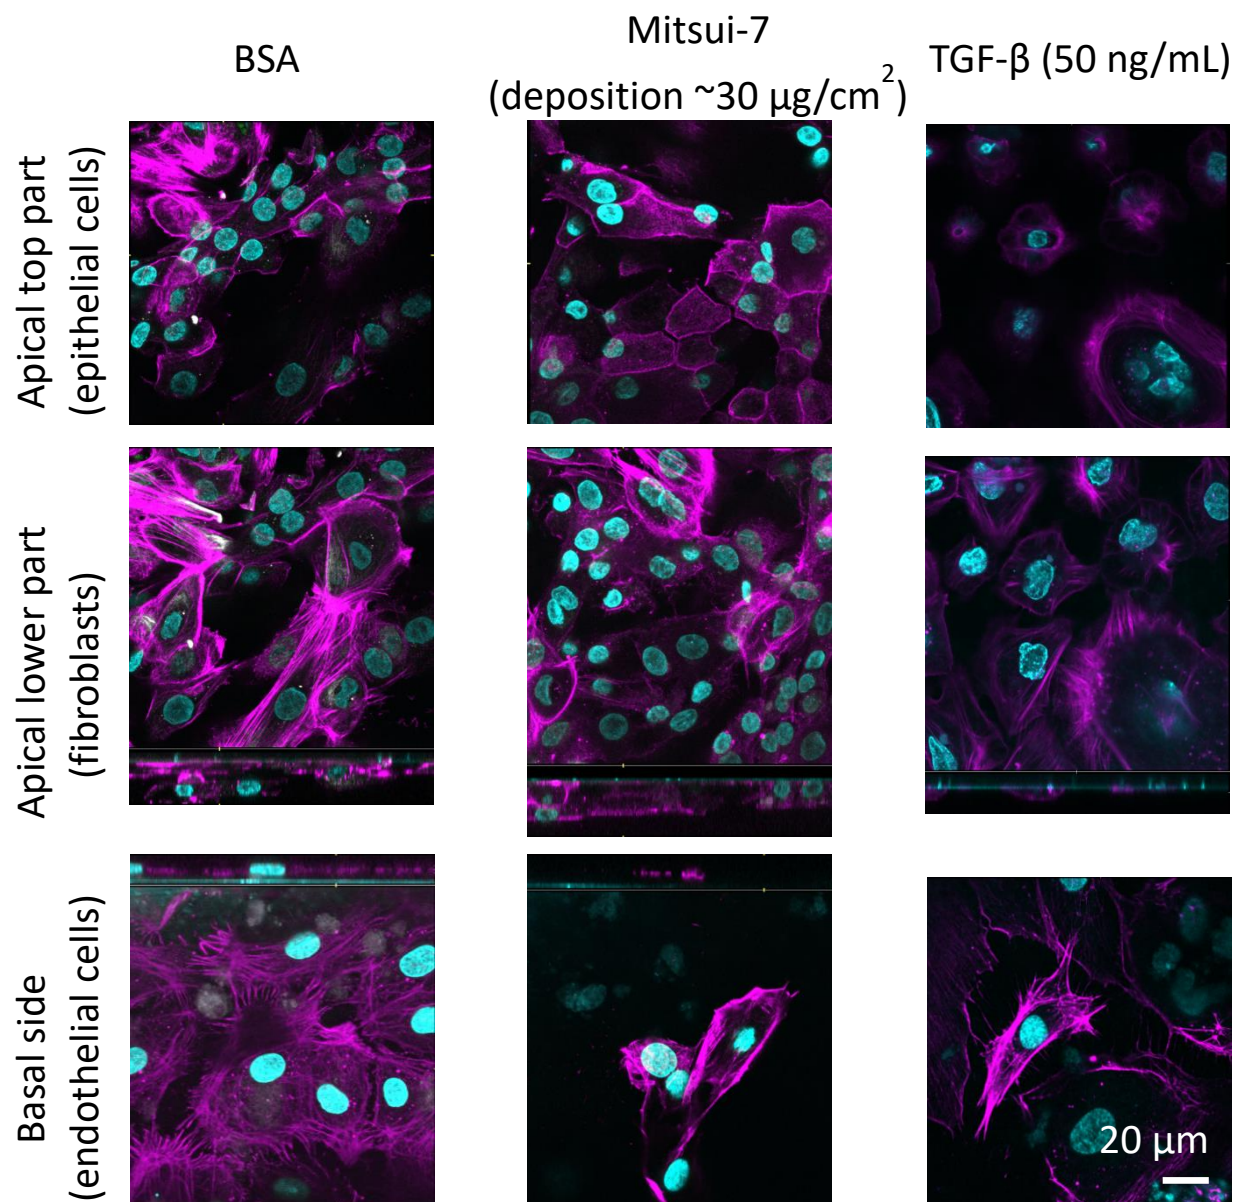

### Supplementary Figure 9

Representative confocal laser scanning microscopy images of (-) MDMs model at D21 exposed to BSA, Mitsui-7 MWCNTs and 50 ng/mL TGF- $\beta$ . Magenta represents the F-actin cytoskeleton, cyan stains cell nuclei. Scale bar is 20  $\mu\text{m}$ . Data obtained in Laboratory 2.

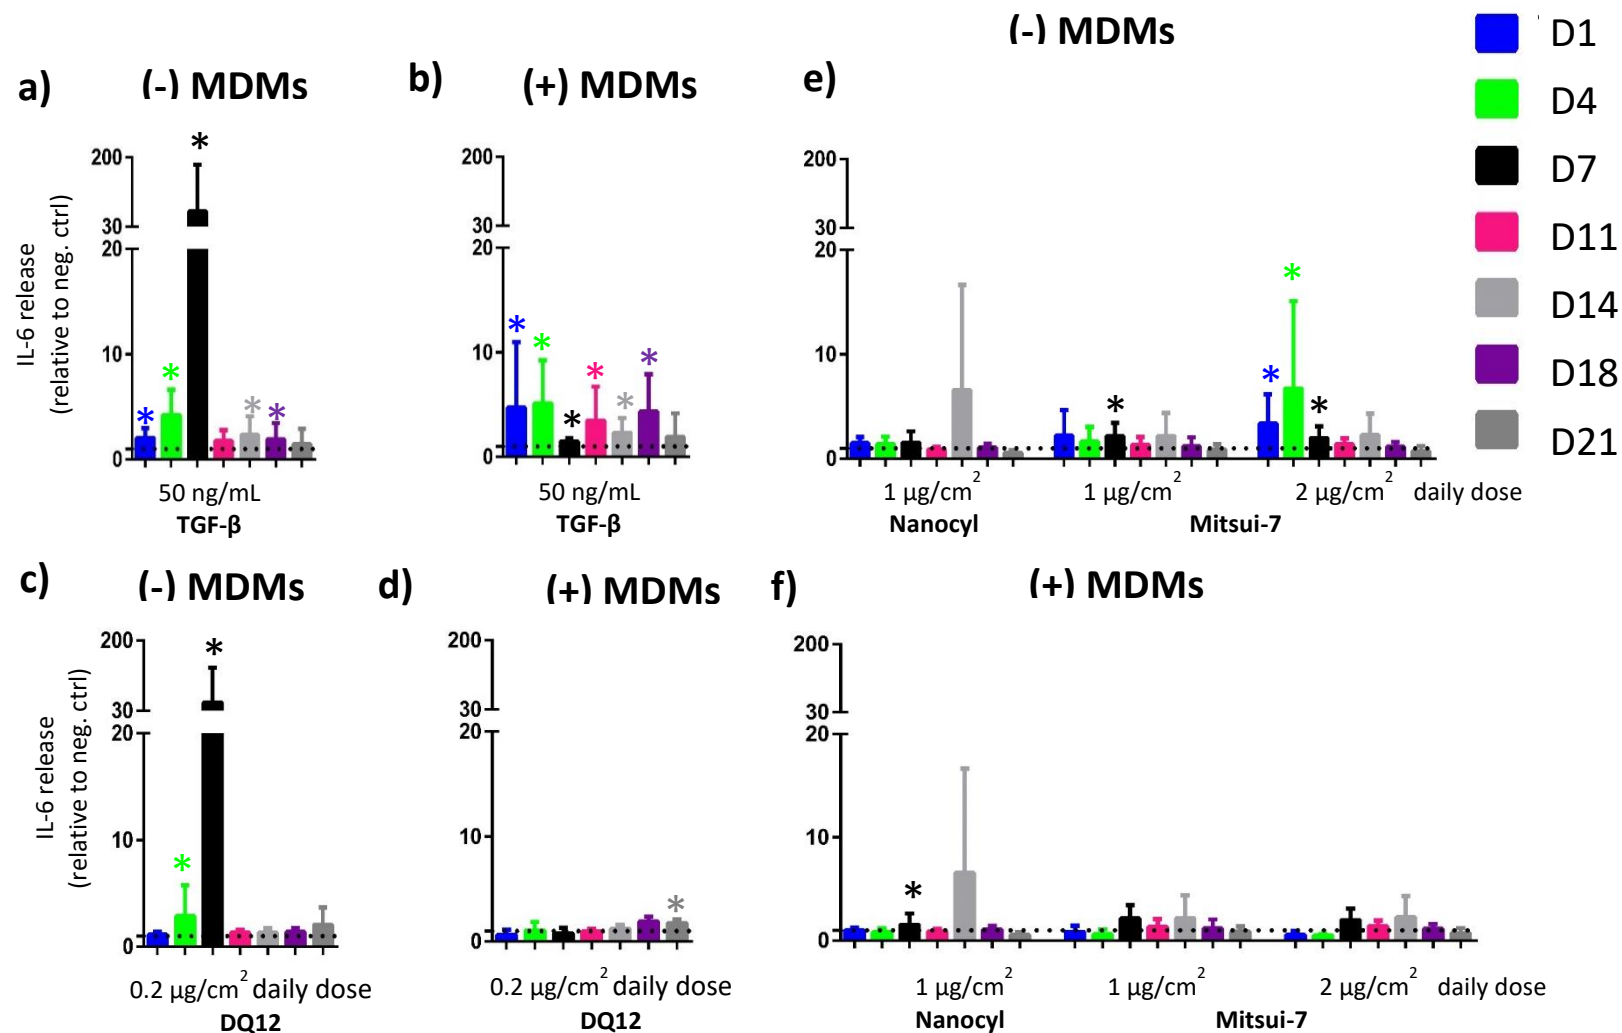

### Supplementary Figure 10

Interleukin 6 release as a marker of (pro-)inflammatory response from tissues without macrophages (a, c, e) and with macrophages (b, d, f). Data are presented as relative to negative control (dash line); untreated cells served as negative control for positive control-treated cells (a, b) and DQ12-treated tissues (c, d), while BSA-treated cells served as negative control for MWCNTs-treated cells (e, f). Data are presented as mean±standard deviation (SD) (n=3). Data marked as (\*) were considered statistically significant ( $p<0.05$ ) increased compared to negative control. Data obtained in Laboratory 2.

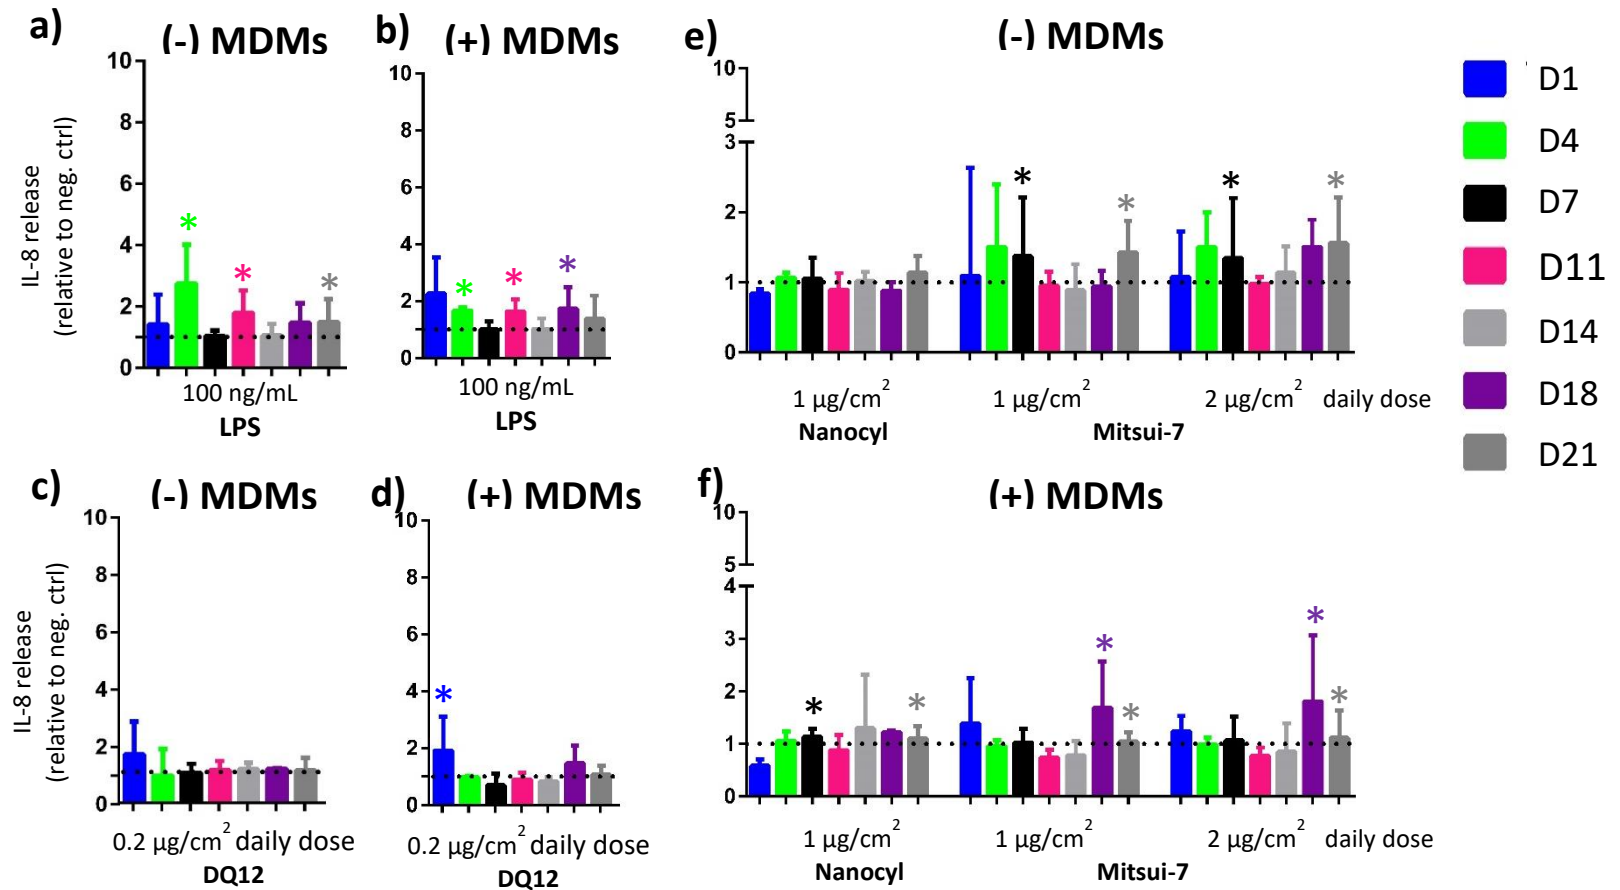

### Supplementary Figure 11

Interleukin 8 release as a marker of (pro-)inflammatory response from tissues without macrophages (a, c, e) and with macrophages (b, d, f). Data are presented as relative to negative control (dash line); untreated cells served as negative control for positive control-treated cells (a, b) and DQ12-treated tissues (c, d), while BSA-treated cells served as negative control for MWCNTs-treated cells (e, f). Data are presented as mean $\pm$ standard deviation (SD) (n=3). Data marked as (\*) were considered statistically significant ( $p<0.05$ ) increased compared to negative control. Data obtained in Laboratory 2.

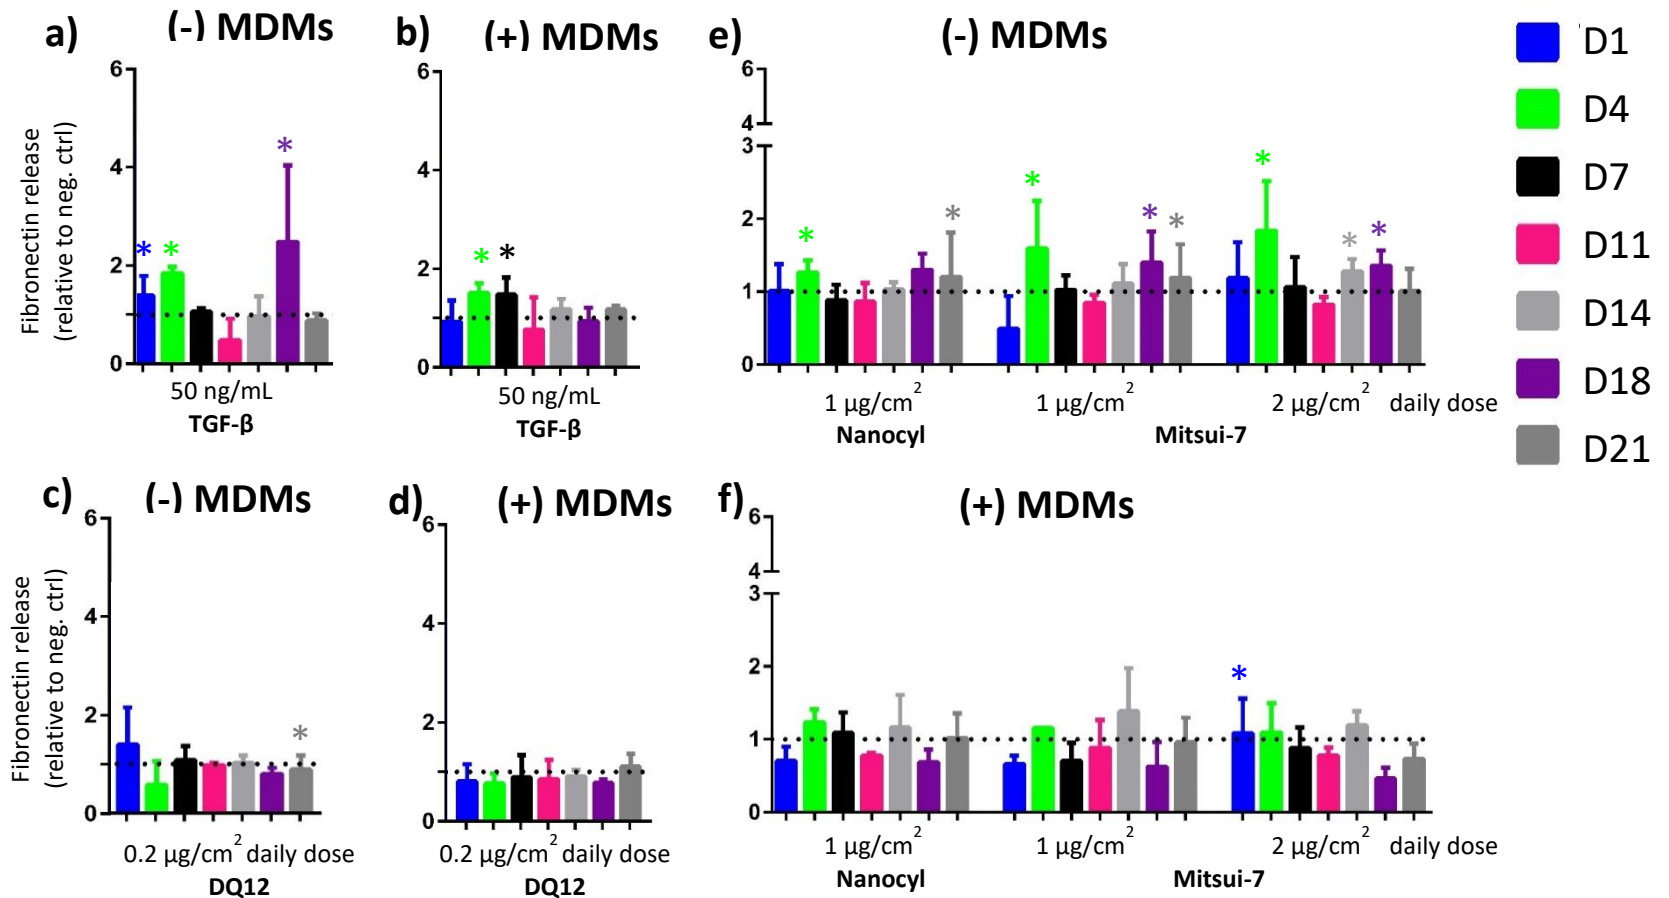

### Supplementary Figure 12

Fibronectin release as a marker of (pro-)fibrotic response from tissues without macrophages (a, c, e) and with macrophages (b, d, f). Data are presented as relative to negative control (dash line); untreated cells served as negative control for positive control-treated cells (a, b) and DQ12-treated tissues (c, d), while BSA-treated cells served as negative control for MWCNTs-treated cells (e, f). Data are presented as mean $\pm$ standard deviation (SD) (n=3). Data marked as (\*) were considered statistically significant (p<0.05) increased compared to negative control. Data obtained in Laboratory 2.



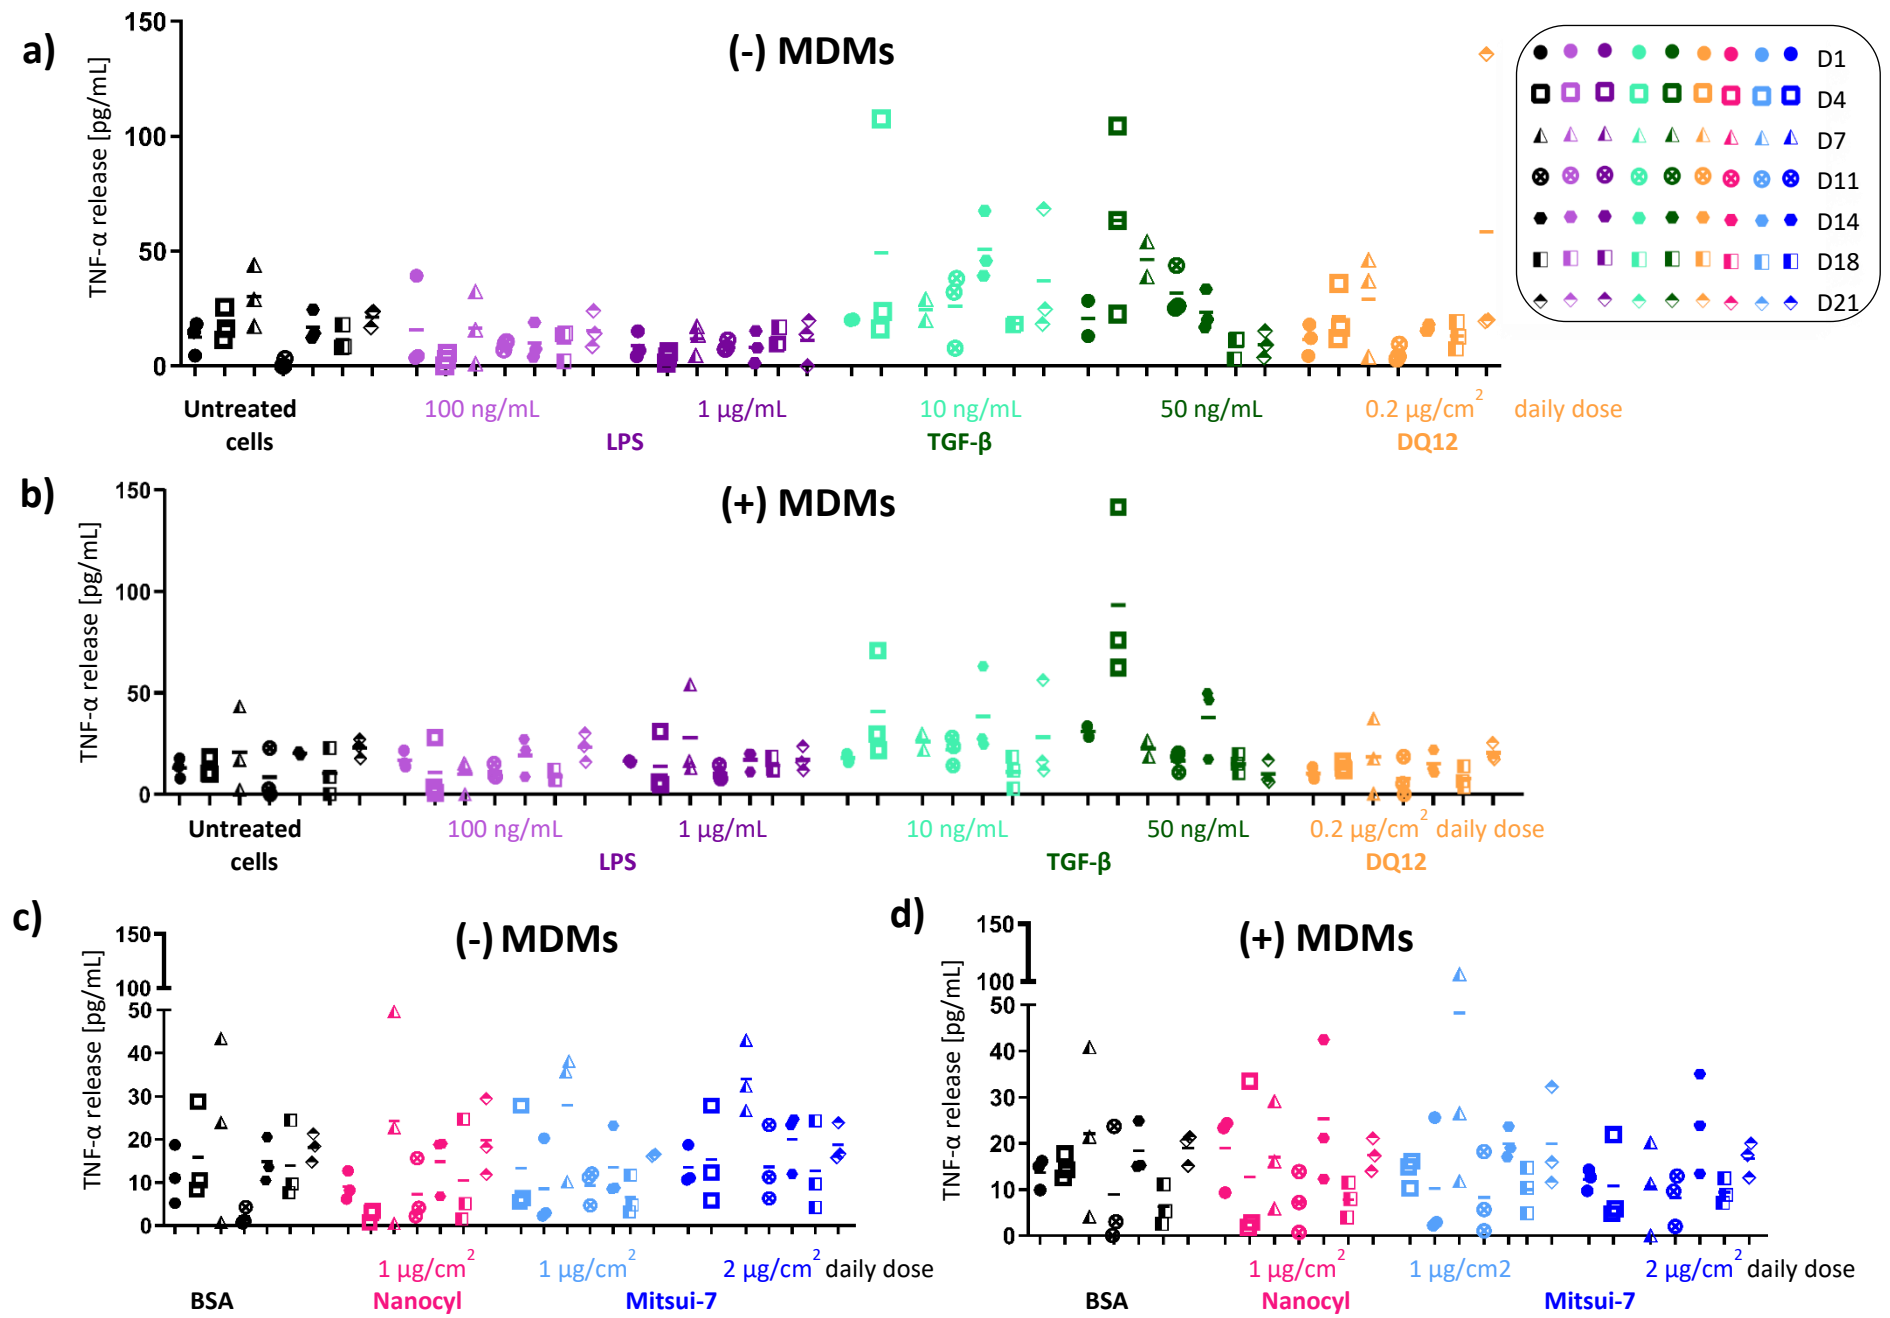

**Supplementary Figure 13**

Tumor necrosis factor  $\alpha$  release from tissues without macrophages (a, c) and with macrophages (b, d). Data are presented as single values (n=3). Data obtained in Laboratory 2.

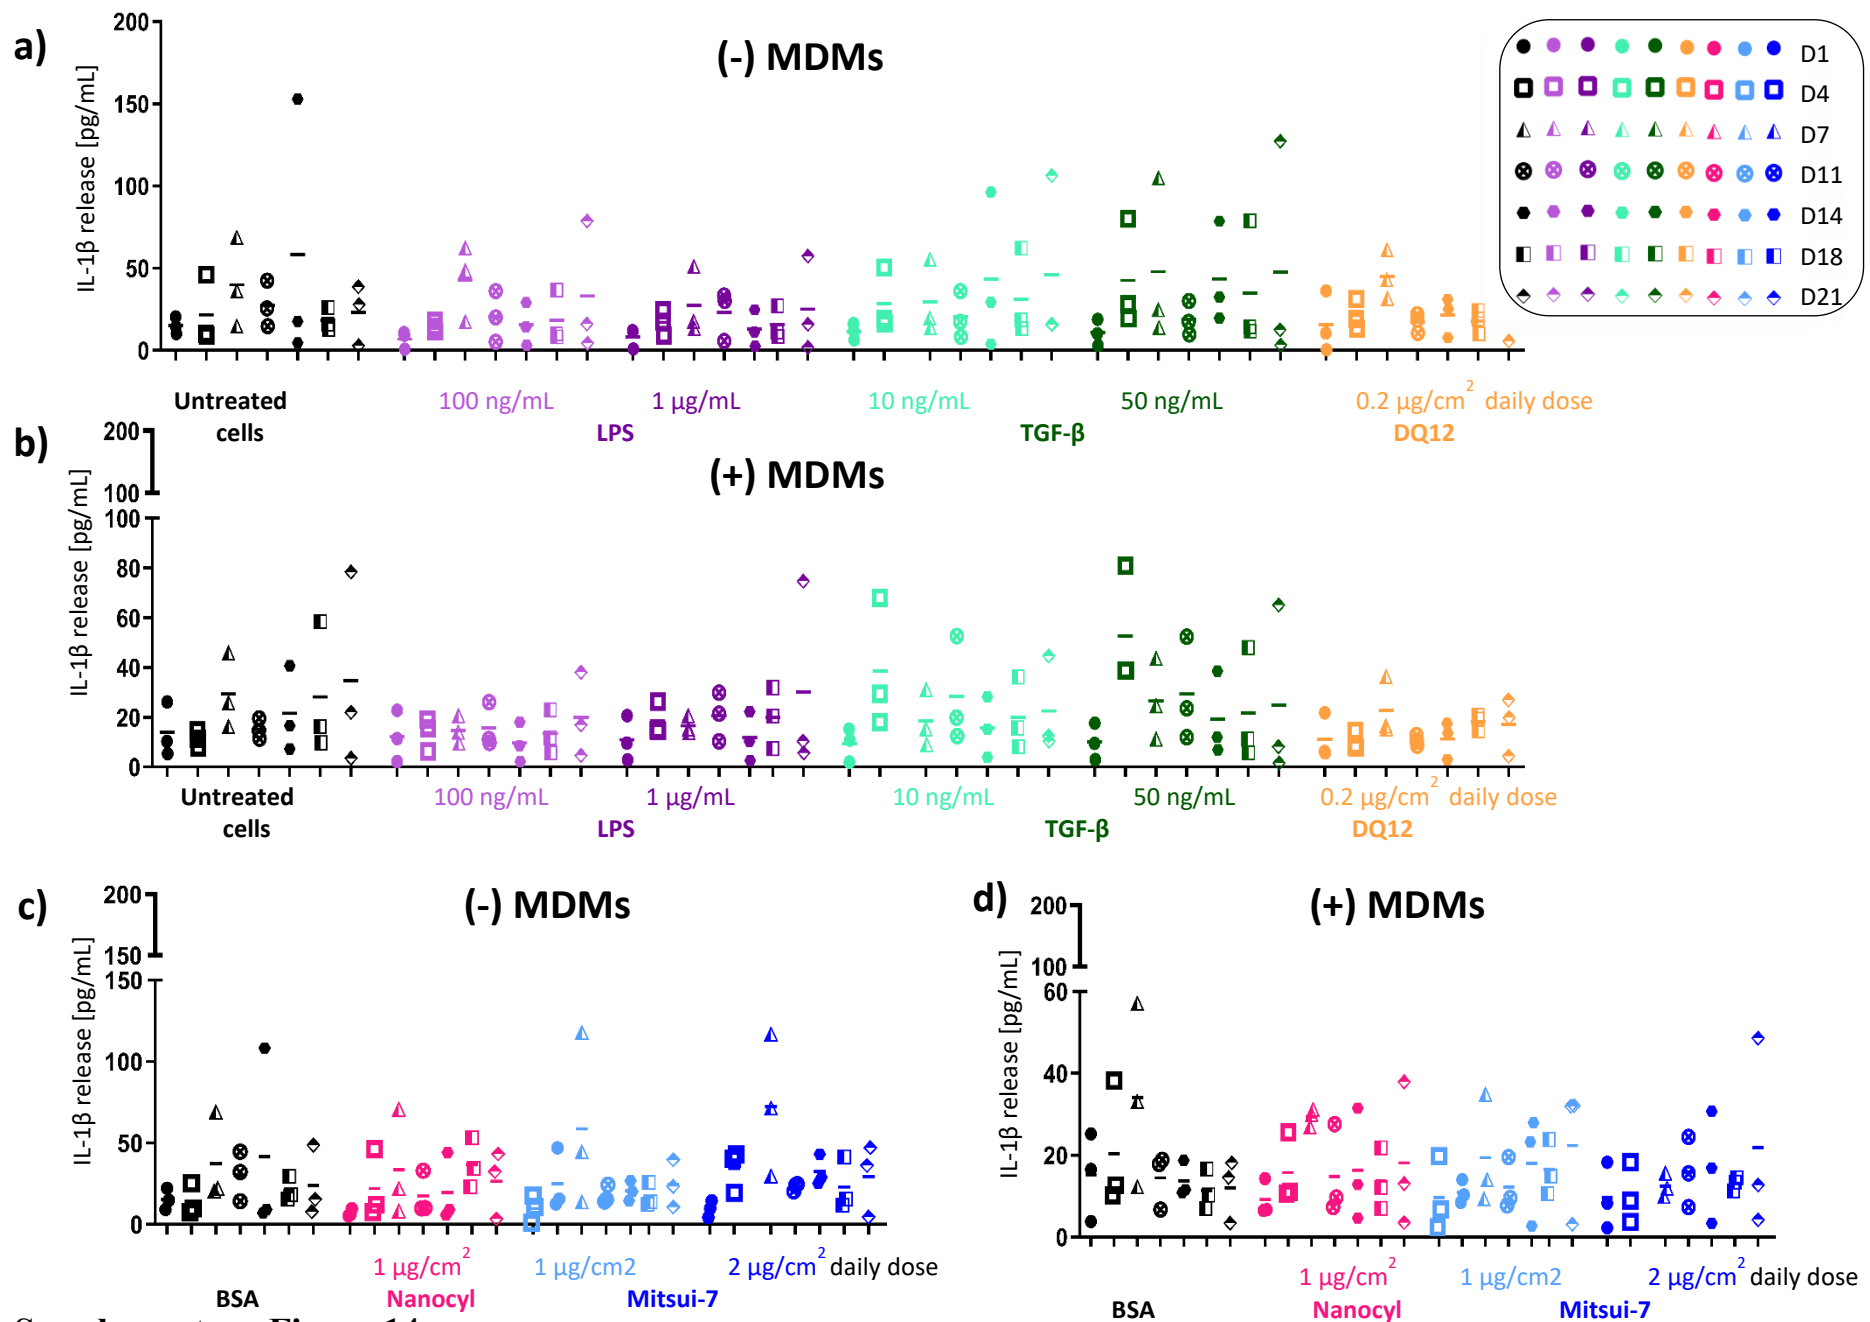

**Supplementary Figure 14**

Interleukin 1 $\beta$  release from tissues without macrophages (a, c) and with macrophages (b, d). Data are presented as single values (n=3). Data obtained in Laboratory 2.

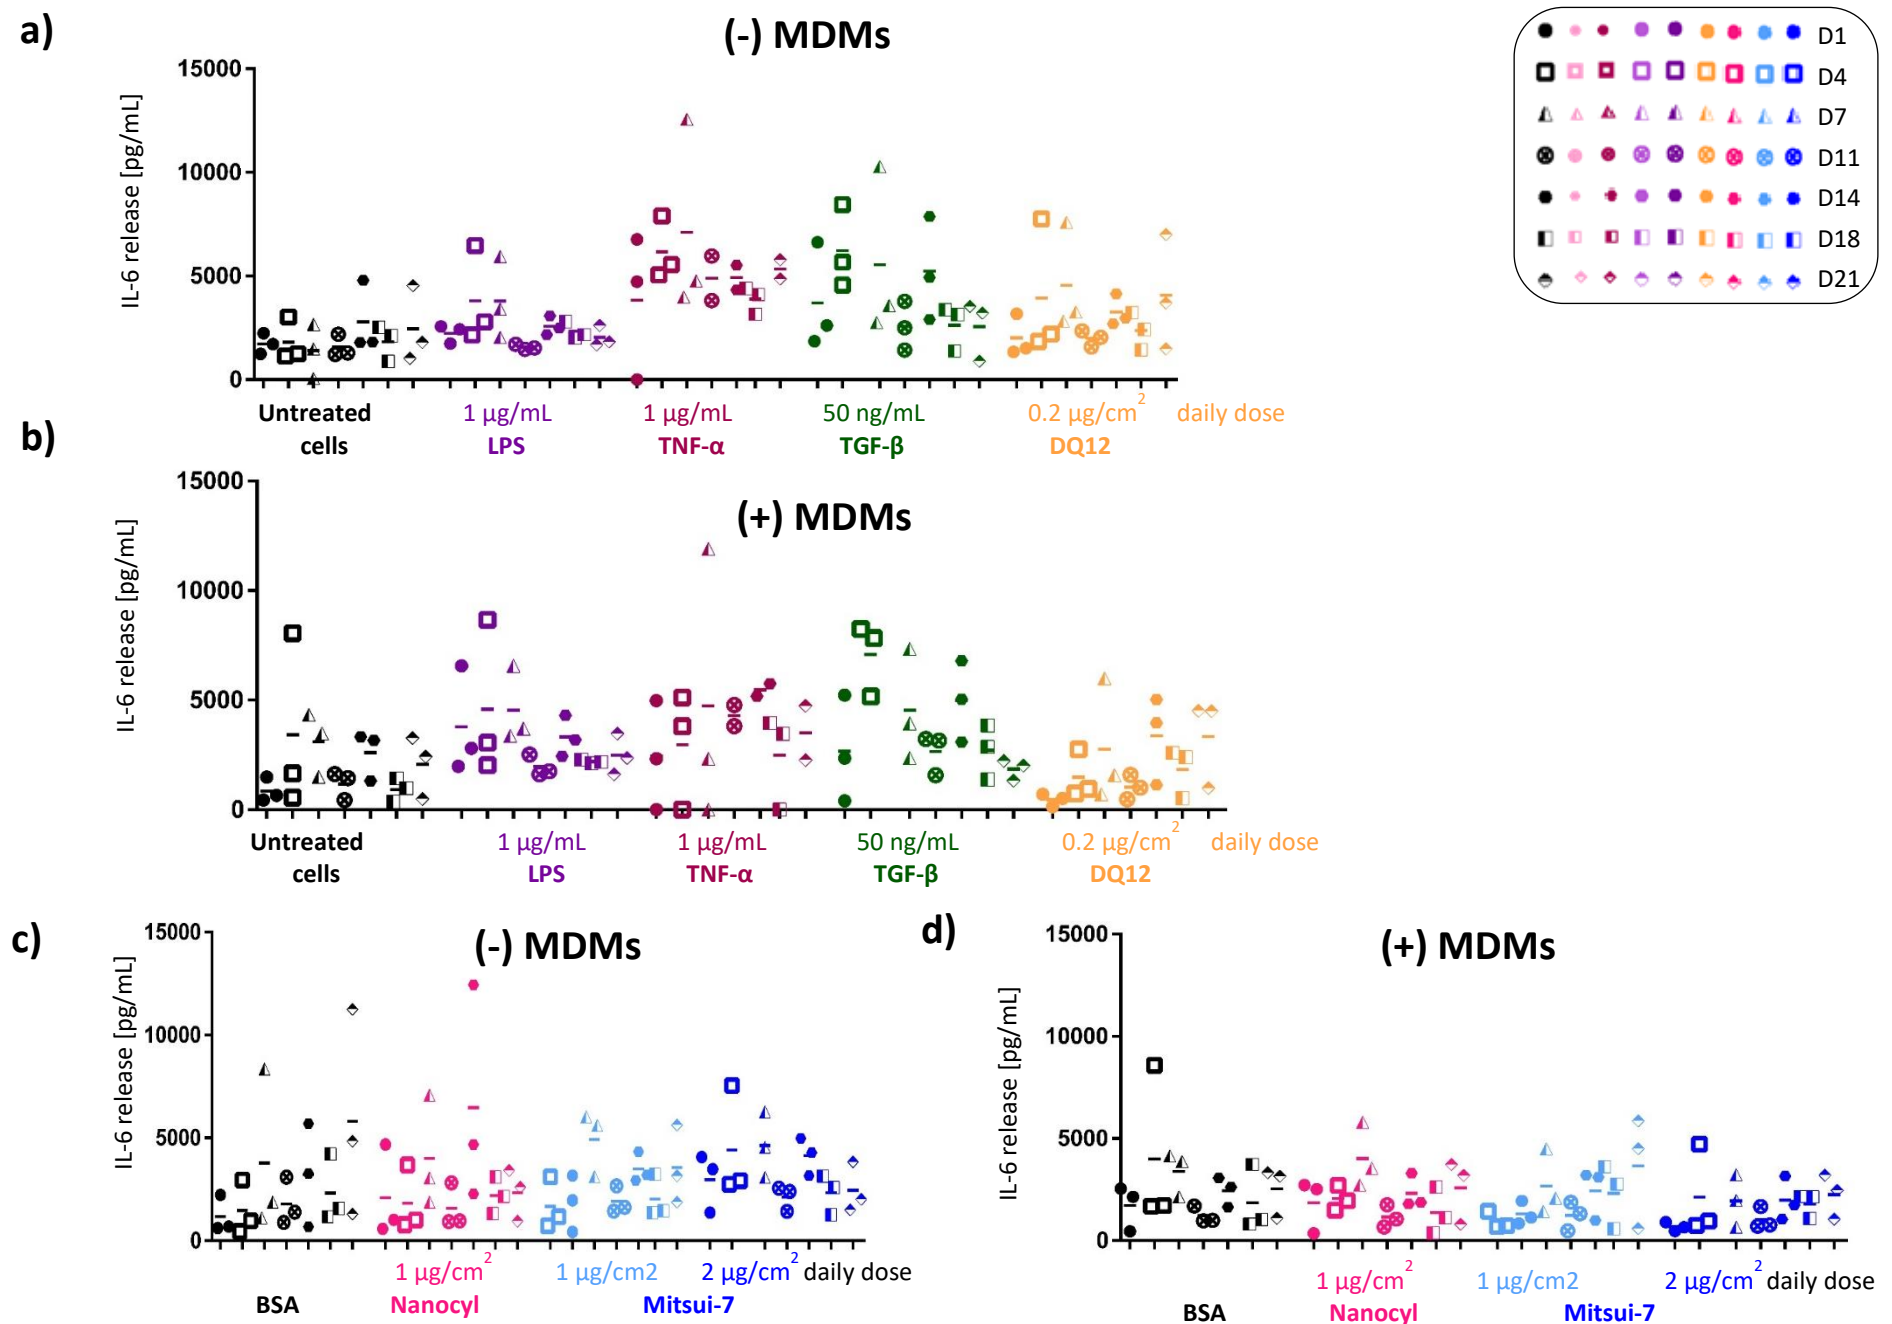

**Supplementary Figure 15**

Interleukin 6 release from tissues without macrophages (a, c) and with macrophages (b, d). Data are presented as single values (n=3). Data obtained in Laboratory 2.

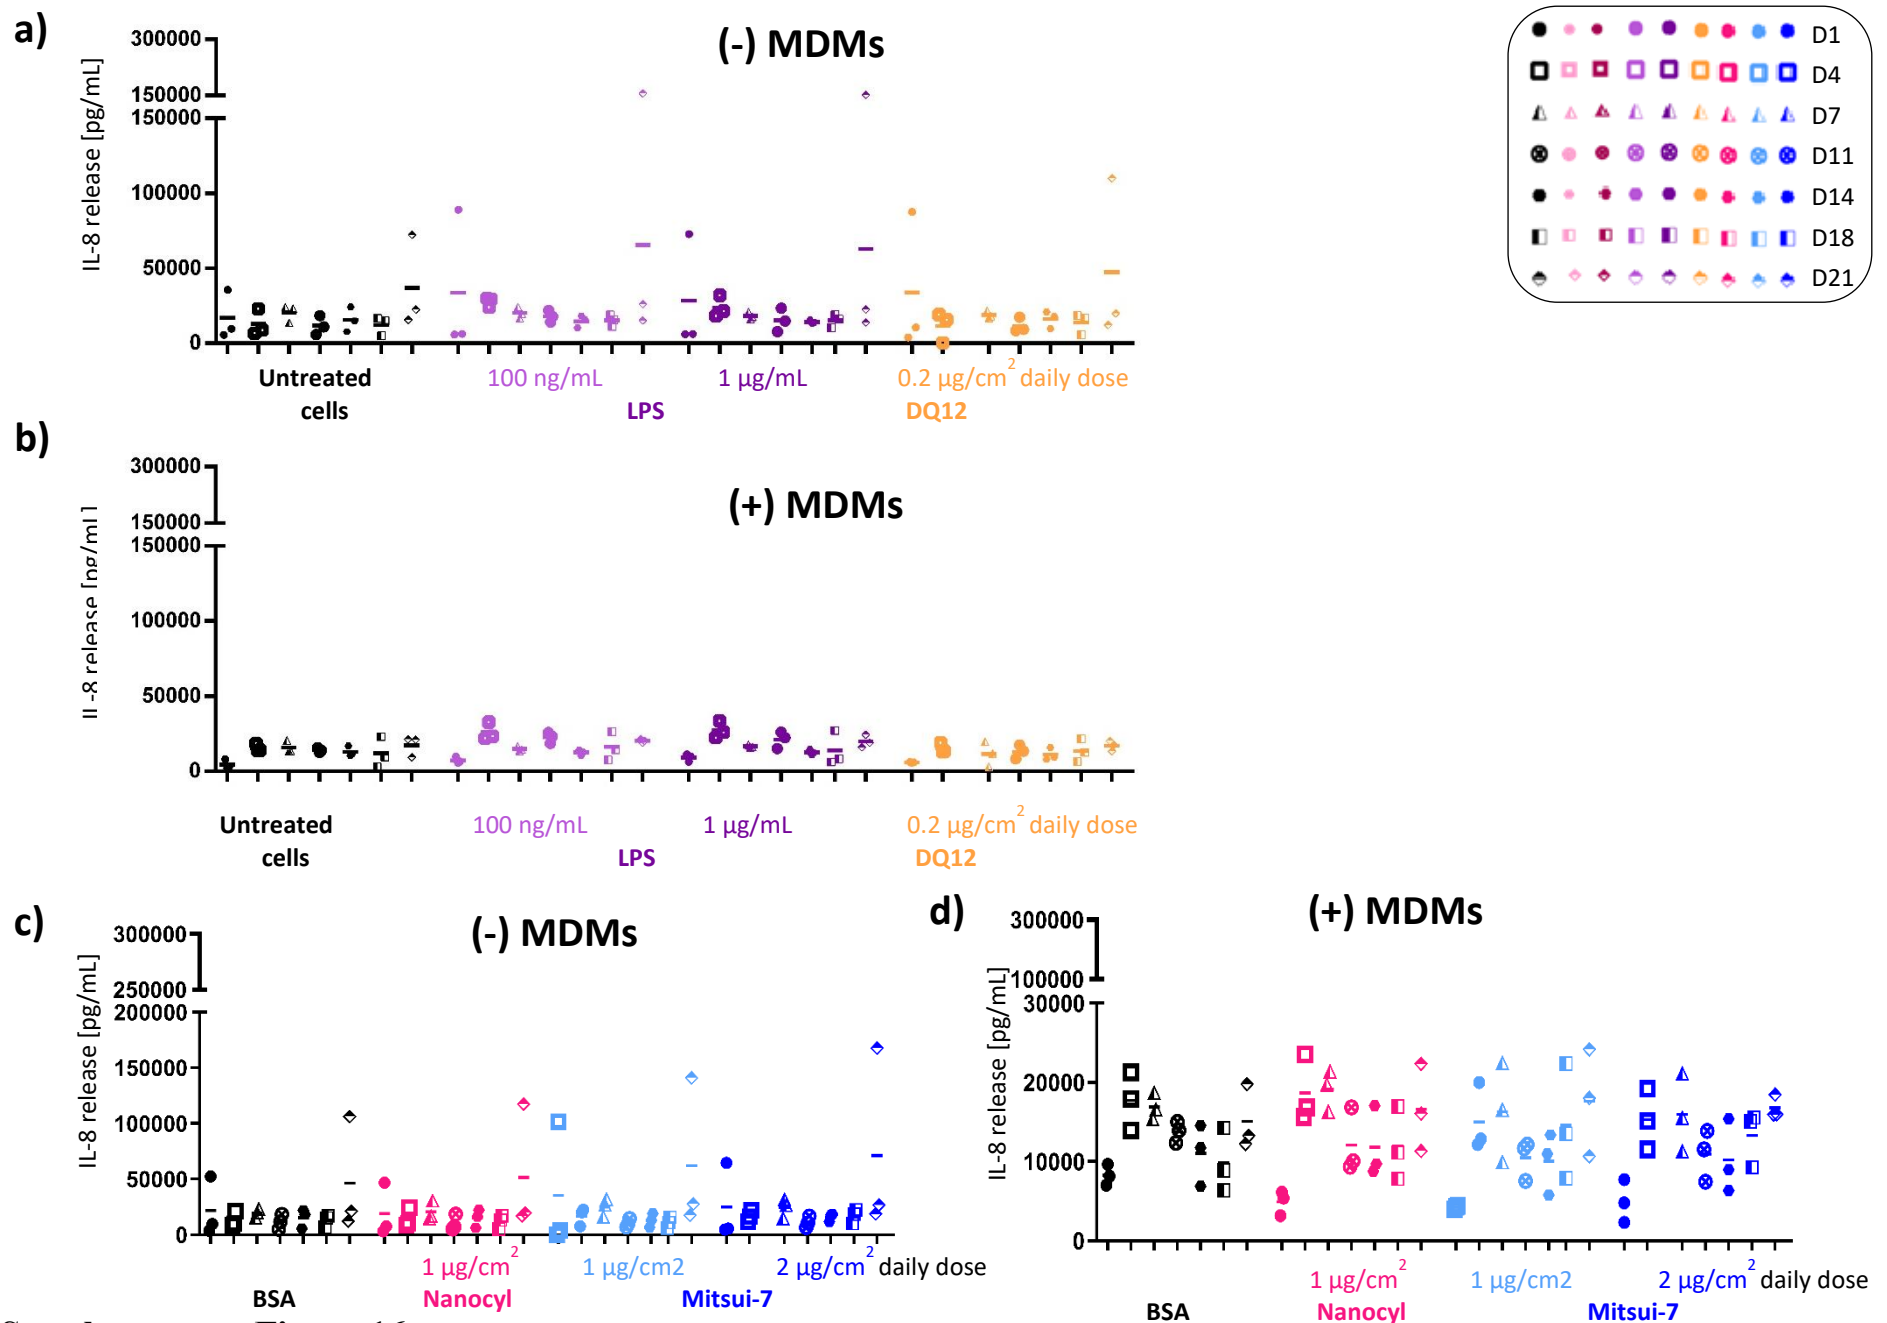

**Supplementary Figure 16**

Interleukin 8 release from tissues without macrophages (a, c) and with macrophages (b, d). Data are presented as single values (n=3). Data obtained in Laboratory 2.



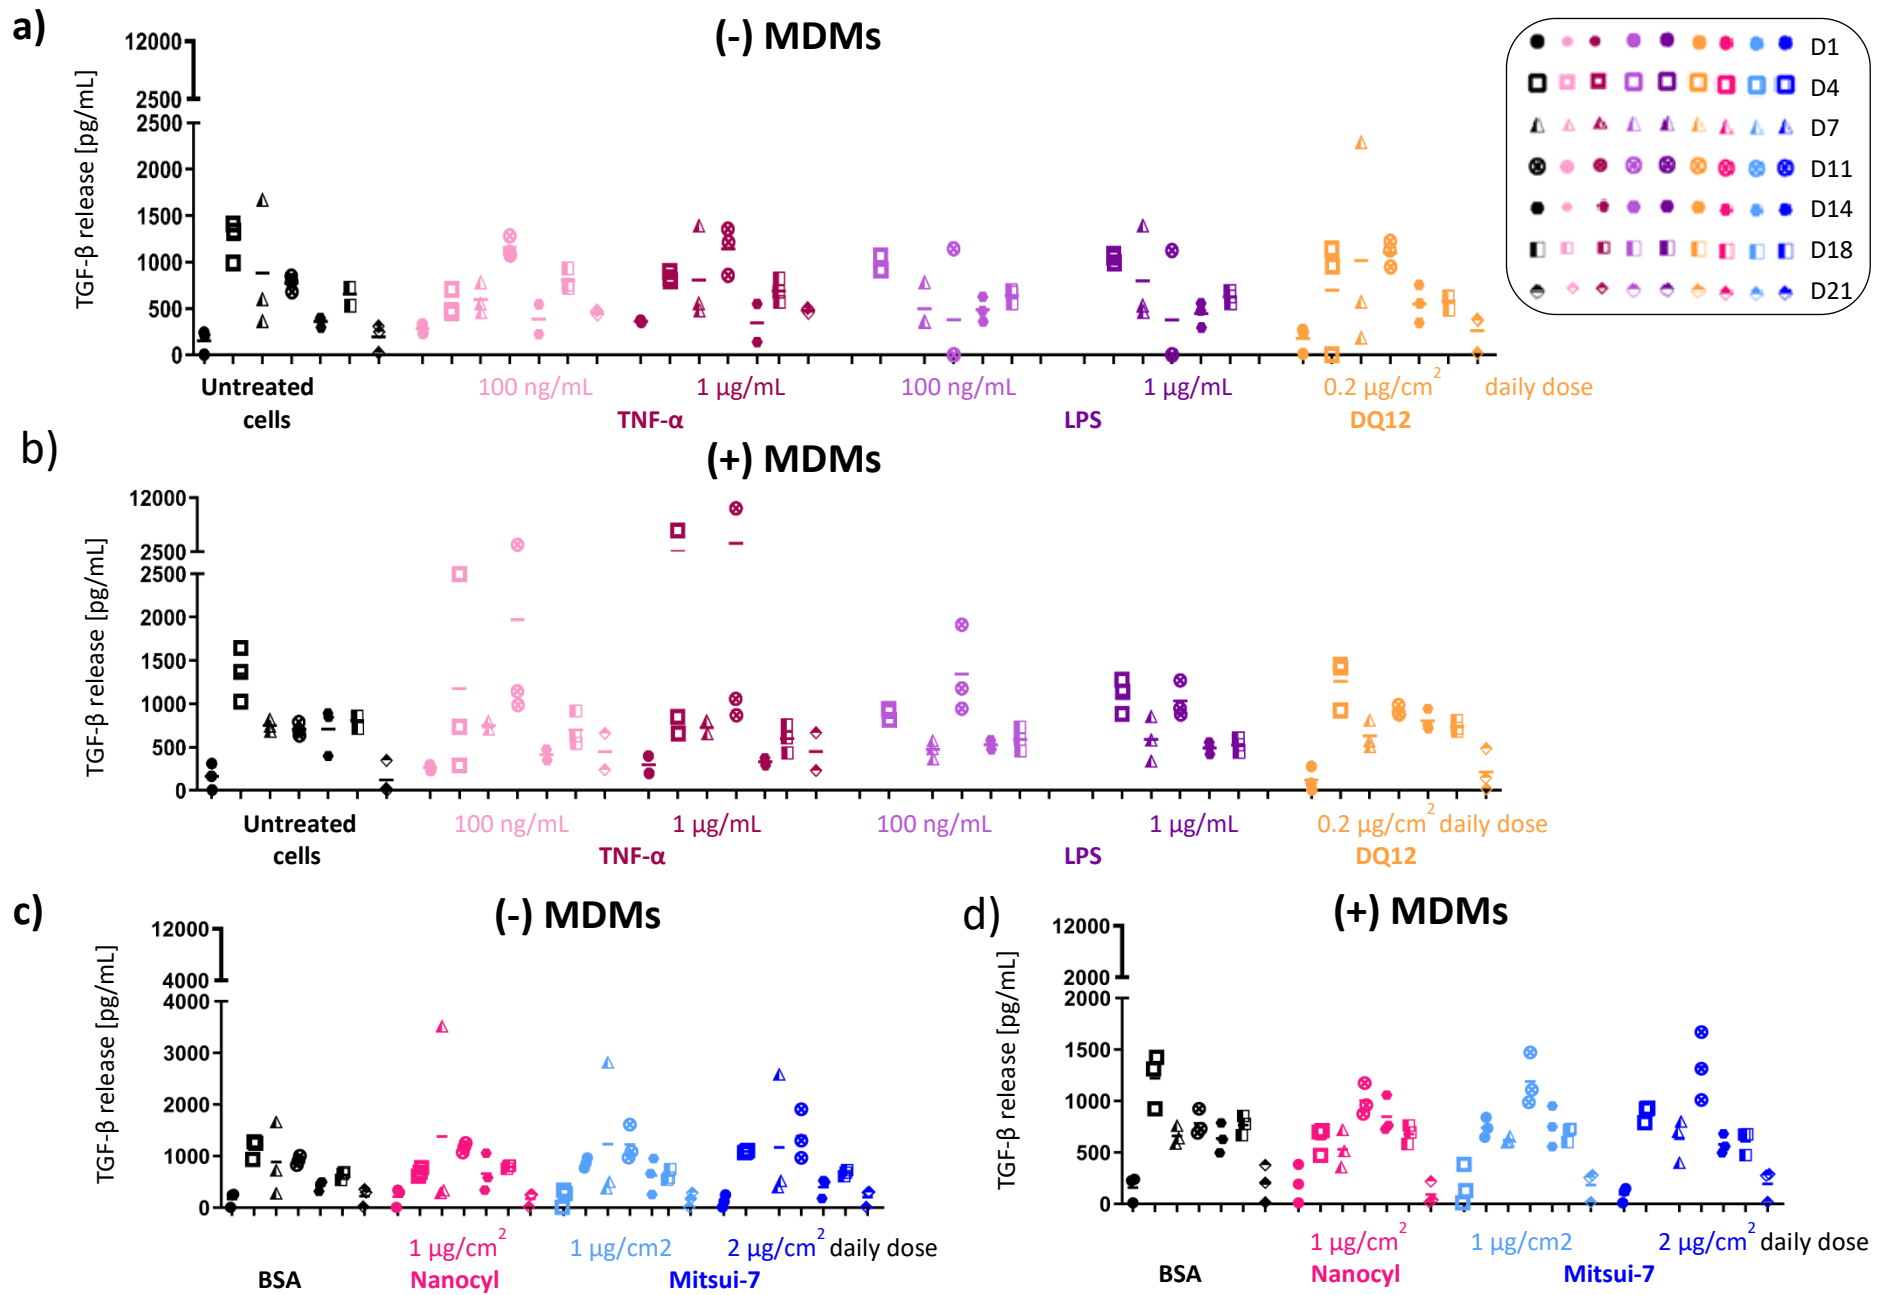

**Supplementary Figure 17**

Transforming growth factor  $\beta$  release from tissues without macrophages (a, c) and with macrophages (b, d). Data are presented as single values (n=3). Data obtained in Laboratory 2.

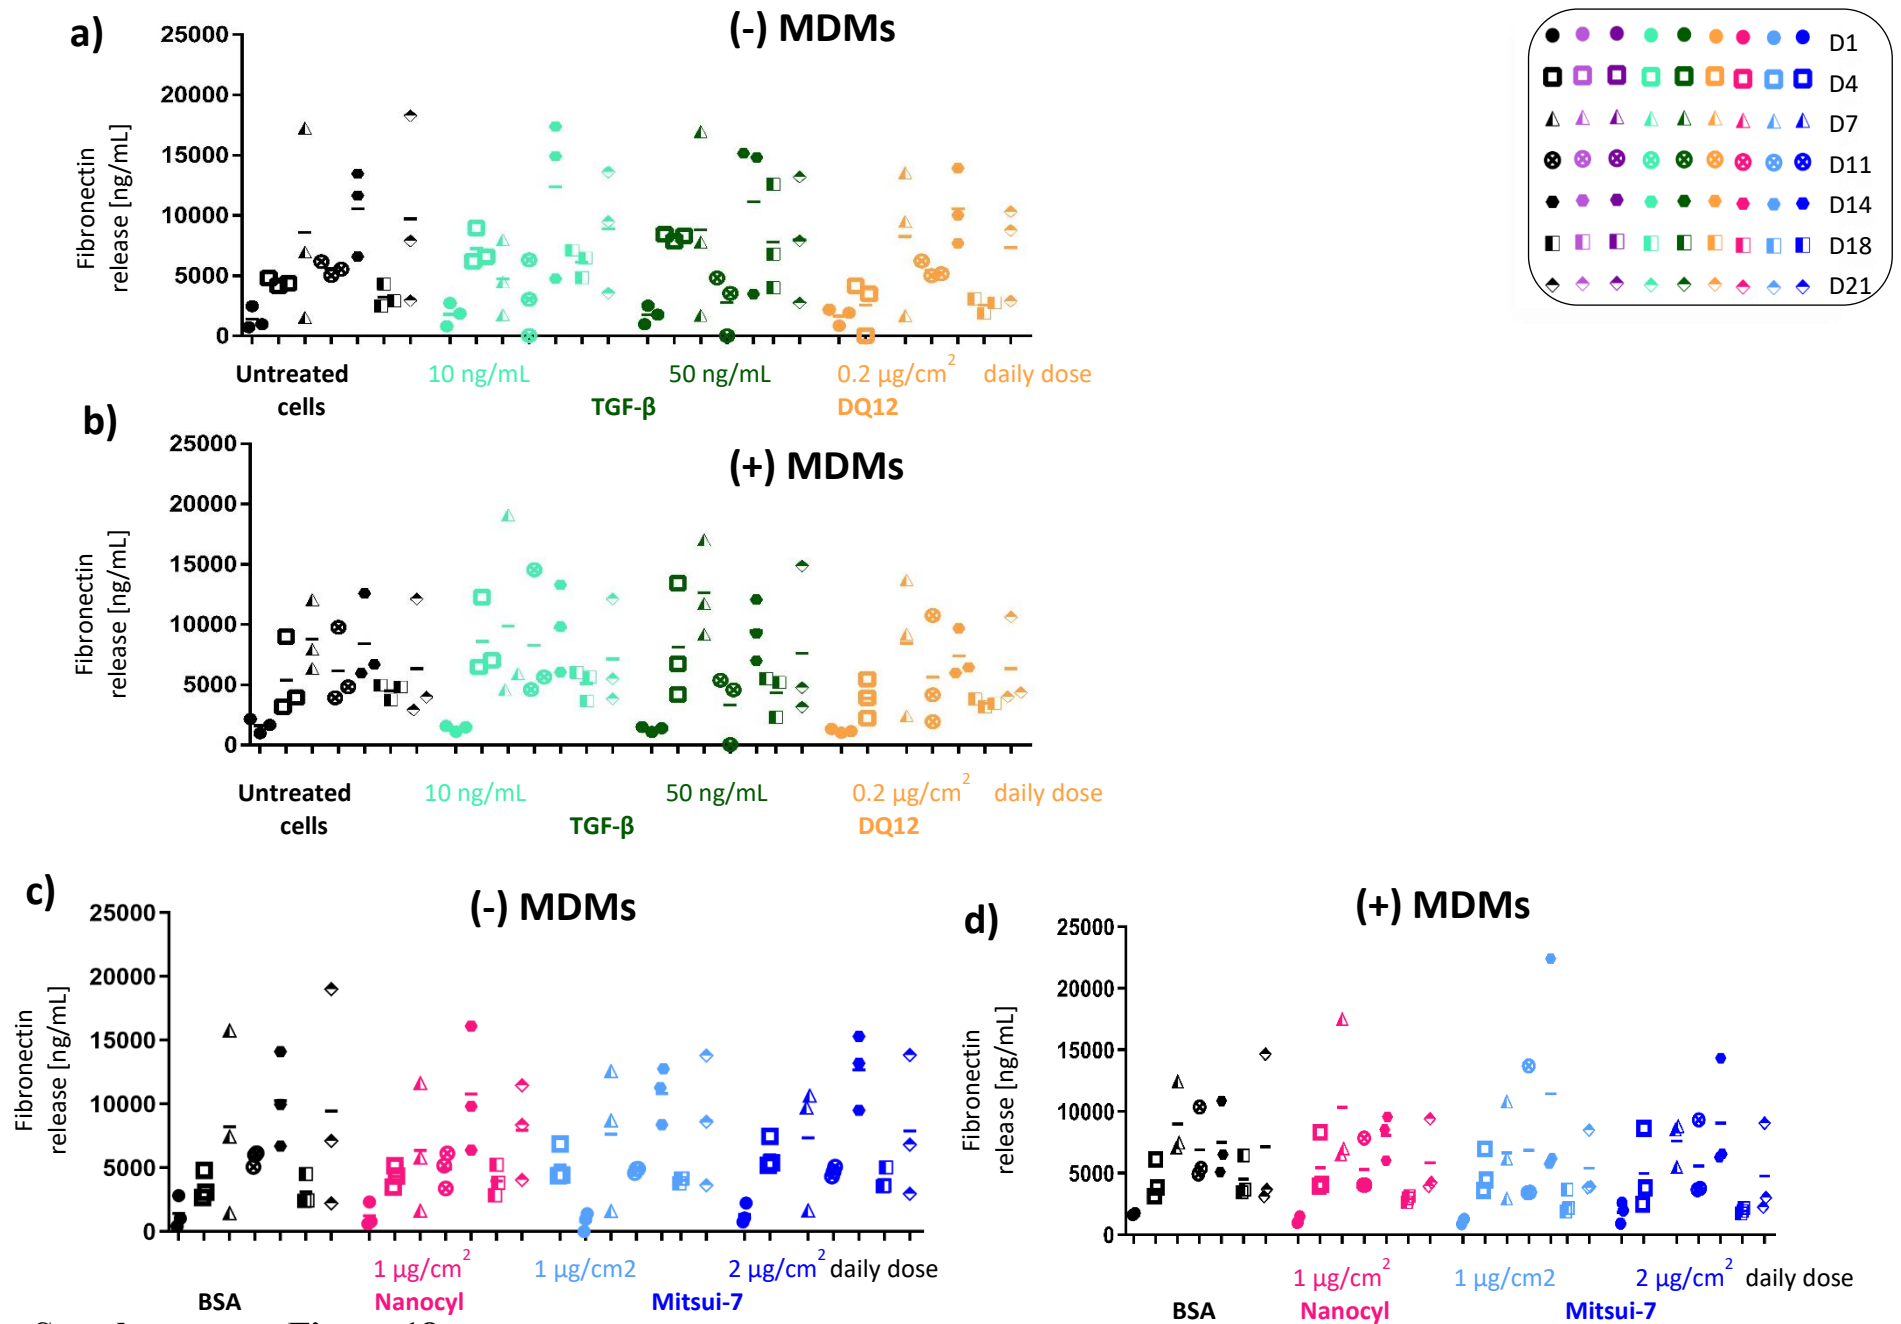

**Supplementary Figure 18**

Fibronectin release from tissues without macrophages (a, c) and with macrophages (b, d). Data are presented as single values (n=3). Data obtained in Laboratory 2.

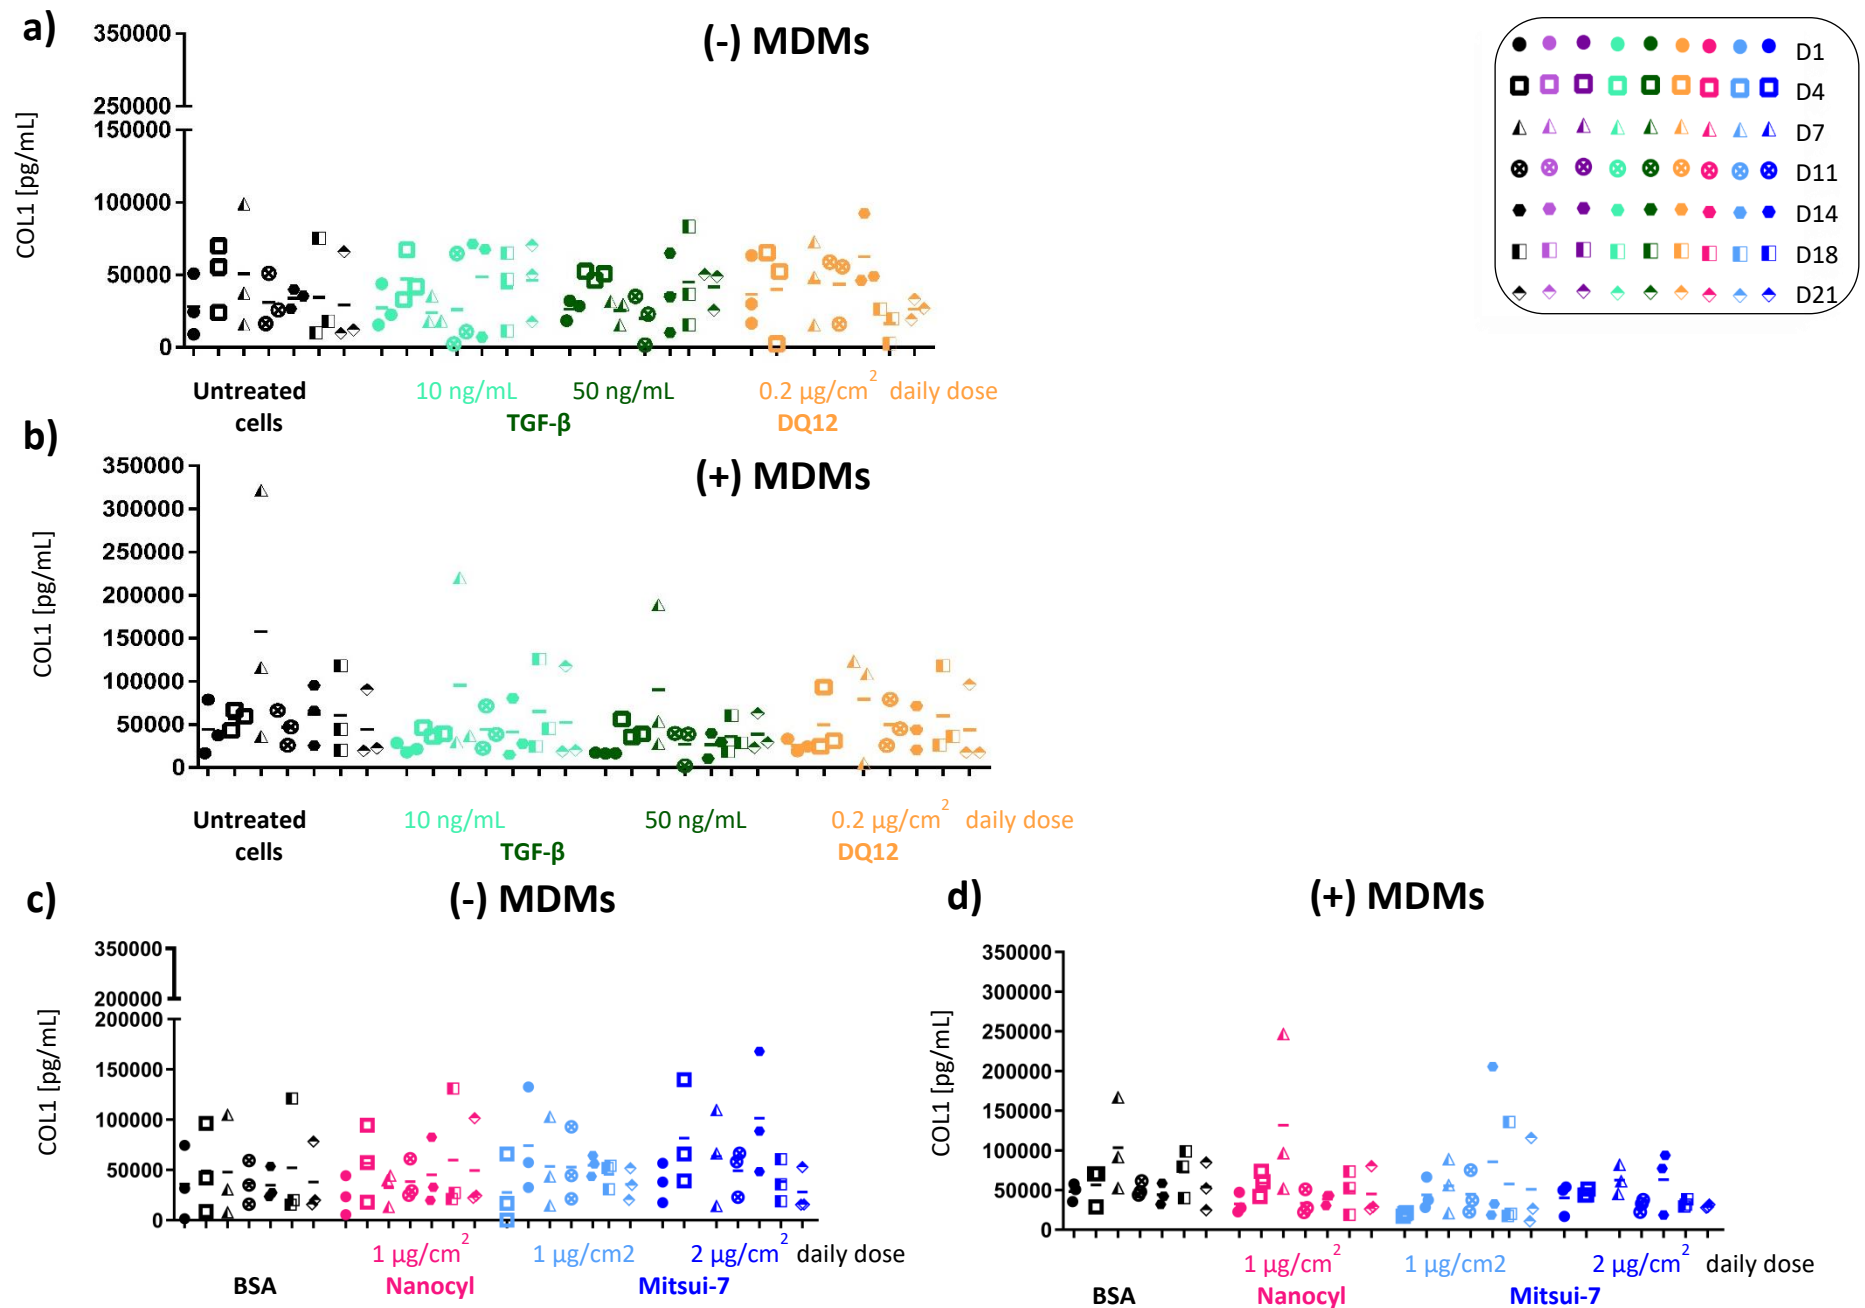

**Supplementary Figure 19**

Collagen type 1 release from tissues without macrophages (a, c) and with macrophages (b, d). Data are presented as single values (n=3). Data obtained in Laboratory 2.

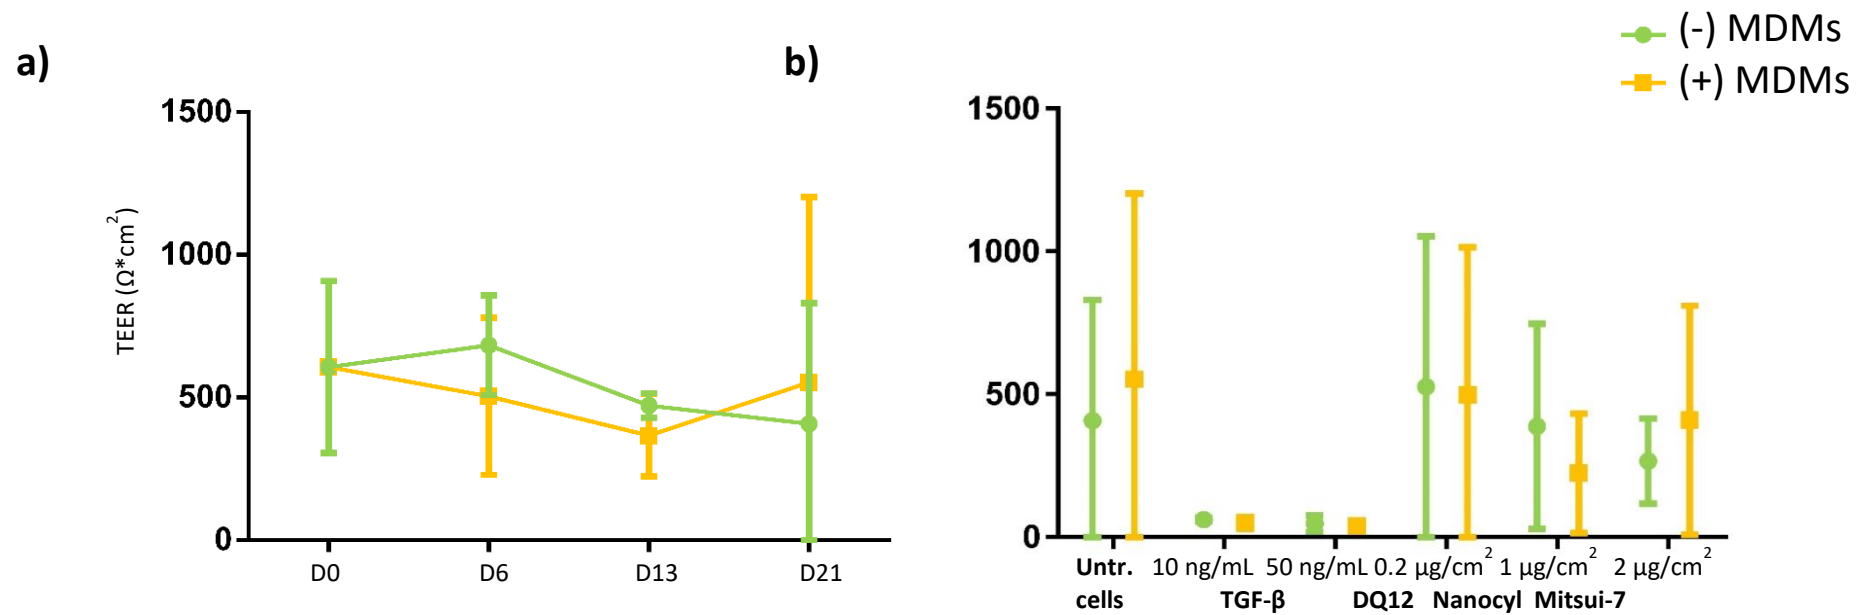

### Supplementary Figure 20

Transepithelial electrical resistance measurement as a marker of cell layer continuity of tissues with (+) and without (-) macrophages. Data are presented as mean $\pm$ standart deviation (SD) (n=3). Data obtained in Laboratory 2.



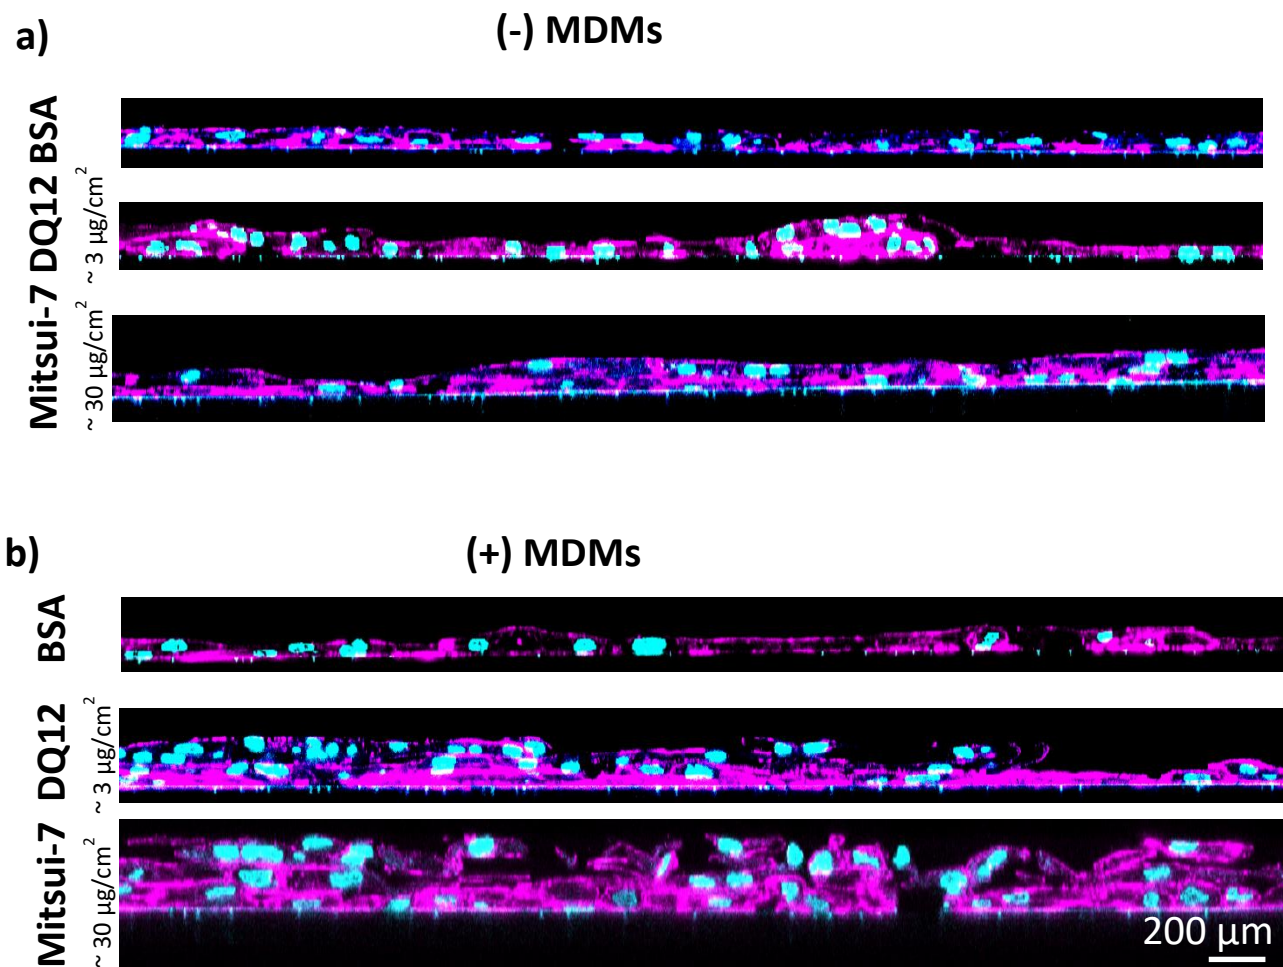

### Supplementary Figure 21

Confocal laser scanning microscopy images of cell layer thickness of tissues (a) (-) MDMs and (b) (+) MDMs after 21 days exposures to BSA, DQ12, and Mitsui-7 MWCNTs. Scale bar is 200  $\mu\text{m}$ . Magenta represents the F-actin cytoskeleton, cyan stains cell nuclei. Data obtained in Laboratory 2.

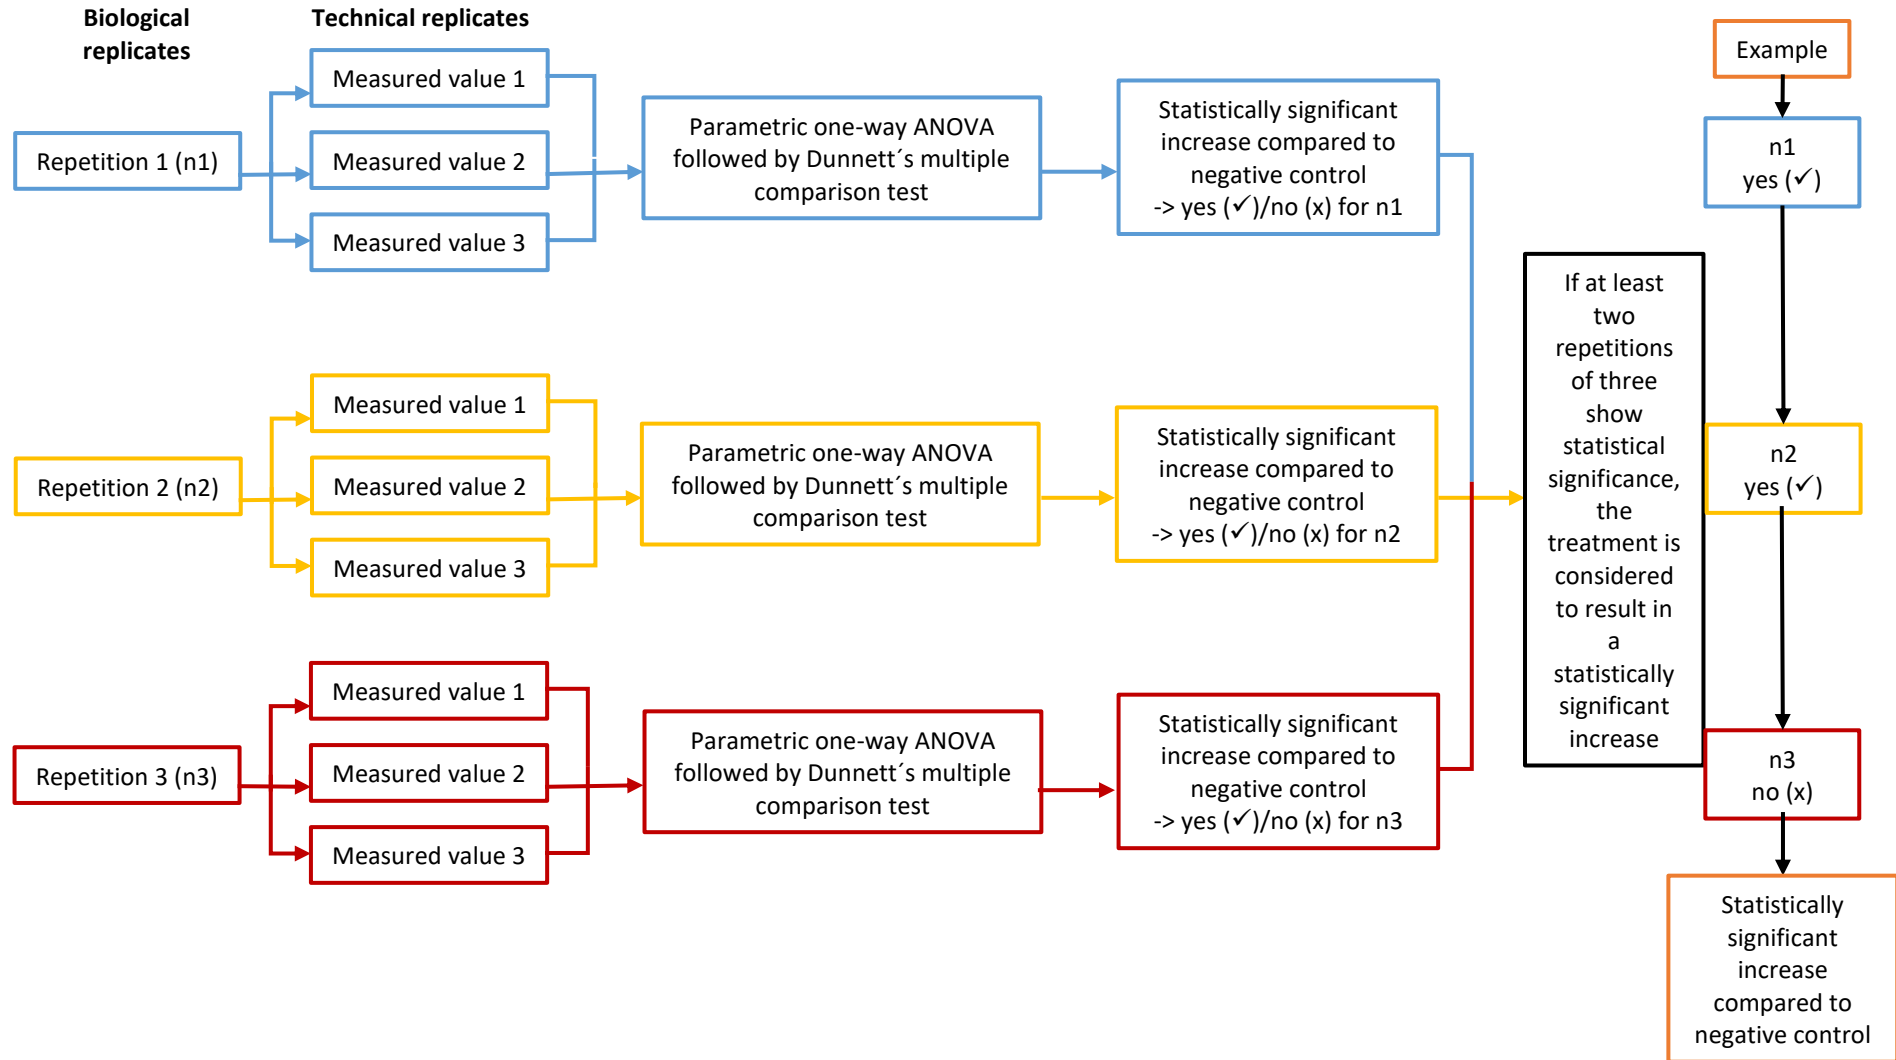

## Supplementary Figure 22

Flowchart depicting statistical analysis performed for protein release.

|                                              | TNF- $\alpha$ |    |    |    |    |    |    |    |    |     |    |    |     |    |    |     |    |    |     |    |    |      |
|----------------------------------------------|---------------|----|----|----|----|----|----|----|----|-----|----|----|-----|----|----|-----|----|----|-----|----|----|------|
|                                              | D1            |    |    | D4 |    |    | D7 |    |    | D11 |    |    | D14 |    |    | D18 |    |    | D21 |    |    | MDMs |
|                                              | n1            | n2 | n3 | n1 | n2 | n3 | n1 | n2 | n3 | n1  | n2 | n3 | n1  | n2 | n3 | n1  | n2 | n3 | n1  | n2 | n3 |      |
| LPS [100 ng/mL]                              | x             | ✓  | x  | x  | x  | x  | x  | x  | x  | ✓   | ✓  | ✓  | x   | ✓  | x  | ✓   | x  | x  | x   | x  | x  | -    |
|                                              | ✓             | ✓  | x  | x  | x  | ✓  | x  | x  | x  | ✓   | ✓  | x  | x   | ✓  | x  | ✓   | ✓  | x  | ✓   | x  | x  | +    |
| LPS [1 $\mu$ g/mL]                           | x             | x  | x  | x  | x  | x  | x  | x  | x  | ✓   | ✓  | ✓  | x   | x  | x  | ✓   | x  | x  | x   | x  | x  | -    |
|                                              | ✓             | ✓  | x  | x  | x  | ✓  | x  | x  | x  | ✓   | ✓  | x  | x   | x  | x  | ✓   | ✓  | x  | x   | x  | x  | +    |
| TGF- $\beta$ [10 ng/mL]                      | x             | ✓  | x  | x  | ✓  | x  | x  | x  | x  | ✓   | ✓  | ✓  | ✓   | ✓  | ✓  | ✓   | ✓  | x  | x   | x  | x  | -    |
|                                              | x             | ✓  | ✓  | ✓  | ✓  | ✓  | x  | ✓  | x  | ✓   | ✓  | x  | x   | ✓  | ✓  | ✓   | x  | x  | x   | ✓  | x  | +    |
| TGF- $\beta$ [50 ng/mL]                      | x             | x  | ✓  | x  | ✓  | ✓  | x  | ✓  | x  | ✓   | ✓  | ✓  | ✓   | ✓  | x  | ✓   | x  | x  | x   | x  | x  | -    |
|                                              | x             | ✓  | ✓  | ✓  | ✓  | ✓  | x  | x  | x  | ✓   | ✓  | x  | ✓   | ✓  | x  | ✓   | ✓  | x  | x   | x  | x  | +    |
| DQ12<br>(0.2 $\mu$ g/cm <sup>2</sup> /day)   | ✓             | ✓  | x  | x  | ✓  | ✓  | x  | ✓  | x  | ✓   | ✓  | ✓  | ✓   | x  | x  | x   | ✓  | x  | x   | x  | x  | -    |
|                                              | x             | x  | x  | x  | ✓  | x  | x  | x  | x  | x   | ✓  | x  | x   | x  | x  | x   | x  | x  | x   | x  | x  | +    |
| Nanocyl<br>(1 $\mu$ g/cm <sup>2</sup> /day)  | x             | x  | x  | x  | x  | x  | x  | x  | ✓  | x   | x  | ✓  | x   | ✓  | x  | ✓   | x  | x  | x   | x  | ✓  | -    |
|                                              | x             | ✓  | ✓  | x  | x  | ✓  | x  | x  | x  | ✓   | ✓  | x  | x   | ✓  | x  | ✓   | x  | x  | x   | x  | x  | +    |
| Mitsui-7<br>(1 $\mu$ g/cm <sup>2</sup> /day) | x             | ✓  | x  | x  | ✓  | x  | x  | x  | x  | ✓   | ✓  | ✓  | x   | ✓  | x  | ✓   | x  | x  | x   | x  | x  | -    |
|                                              | x             | x  | x  | x  | x  | ✓  | x  | x  | x  | x   | ✓  | x  | x   | x  | x  | ✓   | x  | ✓  | x   | x  | ✓  | +    |
| Mitsui-7<br>(2 $\mu$ g/cm <sup>2</sup> /day) | ✓             | ✓  | x  | x  | ✓  | x  | x  | x  | x  | ✓   | ✓  | ✓  | x   | ✓  | ✓  | ✓   | x  | x  | x   | x  | ✓  | -    |
|                                              | x             | x  | x  | x  | x  | ✓  | x  | x  | x  | ✓   | ✓  | x  | x   | ✓  | x  | ✓   | ✓  | x  | ✓   | x  | x  | +    |

x – not statistically significant (compared to negative control)

✓ - statistically significant (compared to negative control)

□ - statistical significance

(-) macrophages

(+) macrophages

### Supplementary table 1

Summary of statistical analysis of the obtained data of Tumor necrosis factor  $\alpha$  release from both tissues (with and without macrophages), x marks no statistically significant increase ( $p > 0.05$ ), ✓ marks statistically significant increase ( $p < 0.05$ ) compared to negative control. Untreated cells served as negative control for positive controls and DQ12 treated samples, while BSA-treated samples served as negative control for MWCNTs-treated cells. Data obtained in Laboratory 2.

|                                               | IL-1 $\beta$ |    |    |    |    |    |    |    |    |     |    |    |     |    |    |     |    |    |     |    |    |      |
|-----------------------------------------------|--------------|----|----|----|----|----|----|----|----|-----|----|----|-----|----|----|-----|----|----|-----|----|----|------|
|                                               | D1           |    |    | D4 |    |    | D7 |    |    | D11 |    |    | D14 |    |    | D18 |    |    | D21 |    |    | MDMs |
|                                               | n1           | n2 | n3 | n1 | n2 | n3 | n1 | n2 | n3 | n1  | n2 | n3 | n1  | n2 | n3 | n1  | n2 | n3 | n1  | n2 | n3 |      |
| LPS<br>[100 ng/mL]                            | x            | x  | x  | x  | x  | x  | x  | x  | x  | x   | x  | x  | ✓   | x  | x  | x   | x  | x  | ✓   | x  | x  | -    |
|                                               | x            | x  | x  | ✓  | ✓  | x  | x  | x  | x  | x   | x  | x  | x   | x  | x  | x   | x  | x  | x   | x  | x  | +    |
| LPS<br>[1 $\mu$ g/mL]                         | x            | x  | x  | x  | x  | x  | x  | x  | x  | x   | x  | x  | ✓   | x  | x  | x   | x  | x  | ✓   | x  | x  | -    |
|                                               | x            | x  | x  | ✓  | ✓  | x  | x  | x  | x  | ✓   | x  | x  | x   | x  | x  | x   | x  | x  | x   | x  | x  | +    |
| TGF- $\beta$<br>[10 ng/mL]                    | x            | x  | x  | x  | x  | x  | ✓  | x  | x  | x   | x  | x  | ✓   | x  | x  | x   | x  | x  | ✓   | ✓  | x  | -    |
|                                               | x            | x  | x  | ✓  | x  | ✓  | ✓  | x  | x  | ✓   | x  | x  | x   | x  | x  | x   | x  | x  | x   | ✓  | x  | +    |
| TGF- $\beta$<br>[50 ng/mL]                    | x            | x  | x  | x  | x  | ✓  | ✓  | x  | x  | x   | x  | x  | x   | ✓  | x  | ✓   | x  | x  | ✓   | x  | x  | -    |
|                                               | x            | x  | x  | ✓  | x  | ✓  | ✓  | x  | x  | ✓   | x  | x  | x   | x  | x  | x   | x  | x  | x   | ✓  | x  | +    |
| DQ12<br>(0.2<br>$\mu$ g/cm <sup>2</sup> /day) | ✓            | x  | x  | x  | ✓  | x  | ✓  | x  | x  | x   | ✓  | x  | ✓   | ✓  | x  | x   | ✓  | ✓  | x   | x  | x  | -    |
|                                               | x            | x  | x  | x  | x  | x  | x  | x  | x  | x   | x  | x  | x   | x  | x  | x   | x  | ✓  | x   | x  | x  | +    |
| Nanocyl<br>(1 $\mu$ g/cm <sup>2</sup> /day)   | x            | x  | x  | x  | x  | ✓  | x  | x  | x  | x   | x  | x  | x   | x  | x  | x   | ✓  | ✓  | ✓   | ✓  | x  | -    |
|                                               | x            | x  | ✓  | x  | x  | x  | x  | ✓  | x  | ✓   | x  | x  | ✓   | x  | x  | ✓   | x  | x  | ✓   | x  | x  | +    |
| Mitsui-7<br>(1 $\mu$ g/cm <sup>2</sup> /day)  | x            | x  | x  | x  | ✓  | x  | x  | ✓  | x  | x   | ✓  | x  | ✓   | ✓  | x  | x   | x  | x  | ✓   | x  | x  | -    |
|                                               | x            | x  | x  | x  | x  | x  | x  | x  | x  | x   | x  | x  | ✓   | x  | ✓  | ✓   | x  | ✓  | ✓   | ✓  | ✓  | +    |
| Mitsui-7<br>(2 $\mu$ g/cm <sup>2</sup> /day)  | x            | x  | x  | x  | ✓  | ✓  | ✓  | ✓  | ✓  | x   | ✓  | x  | ✓   | ✓  | x  | x   | x  | ✓  | ✓   | x  | x  | -    |
|                                               | x            | x  | x  | x  | x  | x  | x  | x  | x  | x   | x  | x  | ✓   | x  | ✓  | x   | x  | ✓  | ✓   | x  | x  | +    |

X – not statistically significant (compared to negative control)

✓ - statistically significant (compared to negative control)

□ - statistical significance

(-) macrophages

(+) macrophages

## Supplementary table 2

Summary of statistical analysis of the obtained data of Interleukin 1 $\beta$  release from both tissues (with and without macrophages), x marks no statistically significant increase (p>0.05), ✓ marks statistically significant increase (p<0.05) compared to negative control. Untreated cells served as negative control for positive controls and DQ12 treated samples, while BSA-treated samples served as negative control for MWCNTs-treated cells. Data obtained in Laboratory 2.



|                                         | IL-6 |    |    |    |    |    |    |    |    |     |    |    |     |    |    |     |    |    |     |    |    |      |
|-----------------------------------------|------|----|----|----|----|----|----|----|----|-----|----|----|-----|----|----|-----|----|----|-----|----|----|------|
|                                         | D1   |    |    | D4 |    |    | D7 |    |    | D11 |    |    | D14 |    |    | D18 |    |    | D21 |    |    | MDMs |
|                                         | n1   | n2 | n3 | n1 | n2 | n3 | n1 | n2 | n3 | n1  | n2 | n3 | n1  | n2 | n3 | n1  | n2 | n3 | n1  | n2 | n3 |      |
| LPS [1 µg/mL]                           | x    | ✓  | x  | ✓  | ✓  | x  | ✓  | x  | ✓  | ✓   | x  | x  | ✓   | x  | x  | x   | ✓  | x  | x   | ✓  | x  | -    |
|                                         | ✓    | ✓  | ✓  | x  | ✓  | x  | x  | ✓  | x  | x   | ✓  | x  | x   | ✓  | x  | x   | ✓  | ✓  | x   | ✓  | x  | +    |
| TNF-α [1 µg/mL]                         | x    | ✓  | ✓  | ✓  | ✓  | ✓  | ✓  | ✓  | ✓  | x   | ✓  | ✓  | x   | ✓  | x  | x   | ✓  | ✓  | x   | ✓  | x  | -    |
|                                         | x    | ✓  | ✓  | x  | ✓  | ✓  | x  | ✓  | ✓  | x   | ✓  | ✓  | x   | ✓  | ✓  | x   | ✓  | ✓  | x   | ✓  | x  | +    |
| TGF-β [50 ng/mL]                        | x    | ✓  | ✓  | ✓  | ✓  | ✓  | ✓  | ✓  | ✓  | x   | ✓  | x  | ✓   | ✓  | x  | x   | ✓  | ✓  | x   | ✓  | x  | -    |
|                                         | x    | ✓  | ✓  | x  | ✓  | ✓  | x  | ✓  | ✓  | x   | ✓  | ✓  | x   | ✓  | ✓  | x   | ✓  | ✓  | x   | ✓  | x  | +    |
| DQ12<br>(0.2 µg/cm <sup>2</sup> /day)   | x    | x  | x  | ✓  | ✓  | x  | ✓  | ✓  | ✓  | ✓   | x  | x  | ✓   | x  | x  | x   | x  | ✓  | x   | ✓  | x  | -    |
|                                         | x    | x  | ✓  | x  | x  | x  | x  | x  | ✓  | x   | x  | x  | ✓   | x  | x  | x   | x  | ✓  | x   | ✓  | ✓  | +    |
| Nanocyl<br>(1 µg/cm <sup>2</sup> /day)  | x    | x  | ✓  | x  | x  | x  | ✓  | x  | x  | x   | x  | x  | ✓   | x  | x  | x   | x  | x  | x   | x  | x  | -    |
|                                         | x    | x  | x  | x  | x  | x  | x  | ✓  | ✓  | x   | x  | x  | x   | x  | x  | x   | x  | x  | x   | x  | x  | +    |
| Mitsui-7<br>(1 µg/cm <sup>2</sup> /day) | x    | ✓  | x  | x  | ✓  | x  | ✓  | ✓  | x  | ✓   | x  | x  | ✓   | x  | x  | ✓   | x  | x  | x   | ✓  | x  | -    |
|                                         | ✓    | x  | x  | x  | x  | x  | x  | x  | x  | x   | x  | ✓  | x   | x  | ✓  | x   | x  | ✓  | x   | x  | ✓  | +    |
| Mitsui-7<br>(2 µg/cm <sup>2</sup> /day) | ✓    | ✓  | ✓  | ✓  | ✓  | x  | ✓  | ✓  | x  | ✓   | x  | x  | ✓   | x  | x  | x   | x  | x  | x   | x  | x  | -    |
|                                         | x    | x  | x  | x  | x  | x  | x  | x  | x  | x   | x  | x  | x   | x  | x  | x   | x  | ✓  | x   | x  | x  | +    |

X – not statistically significant (compared to negative control)

✓ - statistically significant (compared to negative control)

□ - statistical significance

(-) macrophages

(+) macrophages

### Supplementary table 3

Summary of statistical analysis of the obtained data of Tumor necrosis factor α release from both tissues (with and without macrophages), x marks no statistically significant increase (p>0.05), ✓ marks statistically significant increase (p<0.05) compared to negative control. Untreated cells served as negative control for positive controls and DQ12 treated samples, while BSA-treated samples served as negative control for MWCNTs-treated cells. Data obtained in Laboratory 2.

|                             |  | IL-8 |    |    |    |    |    |    |    |    |     |    |    |     |    |    |     |    |    |     |    |    |      |
|-----------------------------|--|------|----|----|----|----|----|----|----|----|-----|----|----|-----|----|----|-----|----|----|-----|----|----|------|
|                             |  | D1   |    |    | D4 |    |    | D7 |    |    | D11 |    |    | D14 |    |    | D18 |    |    | D21 |    |    | MDMs |
|                             |  | n1   | n2 | n3 | n1 | n2 | n3 | n1 | n2 | n3 | n1  | n2 | n3 | n1  | n2 | n3 | n1  | n2 | n3 | n1  | n2 | n3 |      |
|                             |  |      |    |    |    |    |    |    |    |    |     |    |    |     |    |    |     |    |    |     |    |    |      |
| LPS<br>[100 ng/mL]          |  | x    | ✓  | x  | ✓  | ✓  | ✓  | x  | x  | x  | ✓   | ✓  | x  | x   | ✓  | x  | x   | ✓  | x  | ✓   | ✓  | x  | -    |
|                             |  | x    | ✓  | x  | ✓  | ✓  | ✓  | x  | ✓  | x  | x   | ✓  | ✓  | x   | x  | x  | x   | ✓  | ✓  | x   | ✓  | +  |      |
| LPS<br>[1 µg/mL]            |  | x    | ✓  | x  | ✓  | x  | ✓  | x  | ✓  | x  | x   | ✓  | x  | ✓   | x  | x  | x   | ✓  | x  | ✓   | ✓  | x  | -    |
|                             |  | ✓    | ✓  | ✓  | ✓  | ✓  | ✓  | x  | x  | x  | x   | ✓  | ✓  | x   | x  | x  | x   | ✓  | x  | x   | ✓  | +  |      |
| DQ12<br>(0.2<br>µg/cm²/day) |  | x    | ✓  | x  | ✓  | x  | x  | x  | ✓  | x  | x   | x  | x  | ✓   | x  | x  | x   | x  | x  | x   | ✓  | x  | -    |
|                             |  | x    | ✓  | ✓  | x  | x  | x  | x  | x  | x  | x   | x  | x  | x   | x  | x  | x   | ✓  | x  | x   | ✓  | +  |      |
| Nanocyl<br>(1 µg/cm²/day)   |  | x    | x  | x  | x  | x  | x  | x  | x  | ✓  | x   | x  | x  | x   | x  | x  | x   | x  | x  | x   | x  | x  | -    |
|                             |  | x    | x  | x  | x  | ✓  | x  | x  | ✓  | ✓  | x   | x  | x  | ✓   | x  | x  | x   | x  | x  | ✓   | x  | ✓  | +    |
| Mitsui-7<br>(1 µg/cm²/day)  |  | x    | ✓  | x  | x  | x  | x  | x  | ✓  | ✓  | x   | x  | x  | x   | x  | x  | x   | x  | x  | x   | ✓  | ✓  | -    |
|                             |  | x    | x  | x  | x  | x  | ✓  | x  | x  | ✓  | x   | x  | x  | x   | x  | x  | ✓   | x  | ✓  | ✓   | x  | ✓  | +    |
| Mitsui-7<br>(2 µg/cm²/day)  |  | x    | x  | x  | ✓  | x  | x  | x  | ✓  | ✓  | x   | x  | x  | ✓   | x  | x  | x   | ✓  | x  | ✓   | ✓  | ✓  | -    |
|                             |  | x    | x  | x  | x  | x  | x  | x  | ✓  | x  | x   | x  | x  | ✓   | x  | x  | x   | ✓  | ✓  | ✓   | x  | +  |      |

X – not statistically significant (compared to negative control)

✓ - statistically significant (compared to negative control)

□ - statistical significance

(-) macrophages

(+) macrophages

#### Supplementary table 4

Summary of statistical analysis of the obtained data of Interleukin 8 release from both tissues (with and without macrophages), x marks no statistically significant increase ( $p > 0.05$ ), ✓ marks statistically significant increase ( $p < 0.05$ ) compared to negative control. Untreated cells served as negative control for positive controls and DQ12 treated samples, while BSA-treated samples served as negative control for MWCNTs-treated cells. Data obtained in Laboratory 2.

|                            | TGF-β |    |    |    |    |    |    |    |    |     |    |    |     |    |    |     |    |    |     |    |    |      |  |  |
|----------------------------|-------|----|----|----|----|----|----|----|----|-----|----|----|-----|----|----|-----|----|----|-----|----|----|------|--|--|
|                            | D1    |    |    | D4 |    |    | D7 |    |    | D11 |    |    | D14 |    |    | D18 |    |    | D21 |    |    | MDMs |  |  |
|                            | n1    | n2 | n3 | n1 | n2 | n3 | n1 | n2 | n3 | n1  | n2 | n3 | n1  | n2 | n3 | n1  | n2 | n3 | n1  | n2 | n3 |      |  |  |
| LPS                        | x     | x  | x  | x  | x  | x  | x  | x  | x  | x   | x  | x  | x   | x  | ✓  | x   | x  | x  | x   | x  | x  | -    |  |  |
| [100 ng/mL]                | x     | x  | x  | x  | x  | x  | x  | x  | x  | x   | x  | x  | x   | x  | x  | x   | x  | x  | x   | ✓  | x  | +    |  |  |
| LPS                        | x     | x  | x  | x  | x  | x  | x  | ✓  | x  | x   | x  | x  | x   | x  | ✓  | x   | x  | x  | x   | x  | x  | -    |  |  |
| [1 µg/mL]                  | x     | x  | x  | x  | x  | x  | x  | x  | x  | x   | x  | x  | x   | x  | x  | ✓   | x  | x  | ✓   | x  | x  | +    |  |  |
| TNF-α                      | x     | x  | x  | x  | x  | x  | x  | ✓  | x  | x   | x  | ✓  | x   | x  | ✓  | ✓   | ✓  | x  | x   | x  | ✓  | -    |  |  |
| [100 ng/mL]                | x     | x  | ✓  | x  | x  | x  | x  | x  | x  | x   | x  | x  | x   | x  | x  | x   | x  | x  | x   | ✓  | x  | +    |  |  |
| TNF-α                      | x     | ✓  | x  | x  | x  | x  | x  | ✓  | x  | x   | x  | x  | x   | x  | ✓  | ✓   | x  | x  | x   | x  | ✓  | -    |  |  |
| [1 µg/mL]                  | x     | x  | ✓  | x  | x  | x  | x  | x  | x  | x   | x  | x  | x   | x  | x  | x   | x  | x  | x   | ✓  | ✓  | +    |  |  |
| DQ12<br>(0.2 µg/cm²/day)   | x     | x  | x  | x  | x  | x  | ✓  | x  | x  | ✓   | x  | ✓  | ✓   | x  | ✓  | x   | x  | x  | x   | x  | x  | -    |  |  |
|                            | x     | x  | x  | x  | x  | x  | x  | x  | x  | ✓   | x  | ✓  | x   | x  | x  | ✓   | x  | x  | ✓   | ✓  | x  | +    |  |  |
| Nanocyl<br>(1 µg/cm²/day)  | x     | x  | x  | x  | x  | x  | ✓  | ✓  | x  | x   | x  | ✓  | ✓   | x  | x  | ✓   | ✓  | ✓  | x   | x  | x  | -    |  |  |
|                            | x     | x  | ✓  | x  | x  | x  | x  | x  | x  | x   | ✓  | x  | x   | ✓  | x  | ✓   | x  | x  | ✓   | ✓  | x  | +    |  |  |
| Mitsui-7<br>(1 µg/cm²/day) | x     | x  | x  | x  | x  | x  | ✓  | ✓  | x  | x   | ✓  | x  | ✓   | x  | ✓  | x   | x  | x  | x   | x  | x  | -    |  |  |
|                            | x     | x  | ✓  | x  | x  | x  | x  | x  | x  | x   | ✓  | x  | x   | x  | x  | x   | x  | x  | ✓   | x  | x  | +    |  |  |
| Mitsui-7<br>(2 µg/cm²/day) | x     | x  | x  | x  | x  | x  | ✓  | ✓  | x  | x   | ✓  | x  | ✓   | x  | x  | x   | x  | x  | x   | x  | x  | -    |  |  |
|                            | x     | x  | x  | x  | x  | x  | x  | ✓  | x  | x   | ✓  | ✓  | x   | x  | x  | x   | x  | x  | x   | x  | x  | +    |  |  |

X – not statistically significant (compared to negative control)

✓ - statistically significant (compared to negative control)

□ - statistical significance

(-) macrophages

(+) macrophages

## Supplementary table 5

Summary of statistical analysis of the obtained data of Transforming growth factor  $\beta$  release from both tissues (with and without macrophages), x marks no statistically significant increase ( $p > 0.05$ ), ✓ marks statistically significant increase ( $p < 0.05$ ) compared to negative control. Untreated cells served as negative control for positive controls and DQ12 treated samples, while BSA-treated samples served as negative control for MWCNTs-treated cells. Data obtained in Laboratory 2.

|                            | Fibronectin |    |    |    |    |    |    |    |    |     |    |    |     |    |    |     |    |    |     |    |    |      |  |  |
|----------------------------|-------------|----|----|----|----|----|----|----|----|-----|----|----|-----|----|----|-----|----|----|-----|----|----|------|--|--|
|                            | D1          |    |    | D4 |    |    | D7 |    |    | D11 |    |    | D14 |    |    | D18 |    |    | D21 |    |    | MDMs |  |  |
|                            | n1          | n2 | n3 | n1 | n2 | n3 | n1 | n2 | n3 | n1  | n2 | n3 | n1  | n2 | n3 | n1  | n2 | n3 | n1  | n2 | n3 |      |  |  |
| TGF-β<br>[10 ng/mL]        | x           | ✓  | x  | x  | ✓  | x  | x  | x  | x  | ✓   | x  | x  | ✓   | x  | x  | ✓   | ✓  | ✓  | ✓   | ✓  | ✓  | -    |  |  |
|                            | x           | ✓  | x  | ✓  | ✓  | ✓  | ✓  | x  | x  | ✓   | x  | x  | x   | x  | ✓  | ✓   | x  | ✓  | x   | ✓  | ✓  | +    |  |  |
| TGF-β<br>[50 ng/mL]        | ✓           | ✓  | x  | ✓  | ✓  | x  | x  | x  | x  | ✓   | x  | x  | ✓   | x  | x  | ✓   | ✓  | ✓  | ✓   | ✓  | x  | -    |  |  |
|                            | x           | ✓  | x  | ✓  | x  | ✓  | ✓  | ✓  | ✓  | ✓   | x  | x  | x   | x  | ✓  | ✓   | x  | x  | x   | x  | x  | +    |  |  |
| DQ12<br>(0.2 μg/cm²/day)   | x           | ✓  | x  | x  | x  | x  | x  | ✓  | x  | x   | x  | x  | x   | x  | x  | ✓   | x  | x  | ✓   | x  | ✓  | -    |  |  |
|                            | x           | x  | x  | x  | x  | x  | x  | x  | ✓  | ✓   | x  | x  | x   | x  | x  | x   | x  | x  | x   | ✓  | x  | +    |  |  |
| Nanocyl<br>(1 μg/cm²/day)  | ✓           | x  | x  | ✓  | ✓  | x  | x  | x  | x  | x   | x  | x  | x   | x  | x  | x   | x  | ✓  | x   | ✓  | ✓  | -    |  |  |
|                            | x           | x  | x  | ✓  | x  | x  | ✓  | x  | x  | x   | x  | x  | x   | ✓  | x  | x   | x  | x  | x   | ✓  | x  | +    |  |  |
| Mitsui-7<br>(1 μg/cm²/day) | x           | x  | x  | ✓  | ✓  | x  | x  | x  | x  | x   | x  | x  | ✓   | x  | x  | ✓   | ✓  | x  | x   | ✓  | ✓  | -    |  |  |
|                            | x           | x  | x  | ✓  | x  | x  | x  | x  | x  | ✓   | x  | x  | ✓   | x  | x  | x   | x  | x  | x   | ✓  | x  | +    |  |  |
| Mitsui-7<br>(2 μg/cm²/day) | ✓           | x  | x  | ✓  | ✓  | ✓  | x  | ✓  | x  | x   | x  | x  | ✓   | ✓  | x  | ✓   | ✓  | x  | x   | ✓  | x  | -    |  |  |
|                            | ✓           | ✓  | x  | ✓  | x  | x  | ✓  | x  | x  | x   | x  | x  | ✓   | x  | x  | x   | x  | x  | x   | x  | x  | +    |  |  |

X – not statistically significant (compared to negative control)

✓ - statistically significant (compared to negative control)

□ - statistical significance

(-) macrophages

(+) macrophages

## Supplementary table 6

Summary of statistical analysis of the obtained data of Fibronectin release from both tissues (with and without macrophages), x marks no statistically significant increase ( $p > 0.05$ ), ✓ marks statistically significant increase ( $p < 0.05$ ) compared to negative control. Untreated cells served as negative control for positive controls and DQ12 treated samples, while BSA-treated samples served as negative control for MWCNTs-treated cells. Data obtained in Laboratory 2.

|                                               | COL1 |    |    |    |    |    |    |    |    |     |    |    |     |    |    |     |    |    |     |    |    |      |
|-----------------------------------------------|------|----|----|----|----|----|----|----|----|-----|----|----|-----|----|----|-----|----|----|-----|----|----|------|
|                                               | D1   |    |    | D4 |    |    | D7 |    |    | D11 |    |    | D14 |    |    | D18 |    |    | D21 |    |    | MDMs |
|                                               | n1   | n2 | n3 | n1 | n2 | n3 | n1 | n2 | n3 | n1  | n2 | n3 | n1  | n2 | n3 | n1  | n2 | n3 | n1  | n2 | n3 |      |
| TGF- $\beta$<br>[10 ng/mL]                    | ✓    | x  | x  | ✓  | x  | x  | ✓  | x  | x  | ✓   | x  | x  | ✓   | x  | ✓  | x   | x  | x  | ✓   | ✓  | x  | -    |
|                                               | x    | ✓  | x  | x  | x  | x  | x  | x  | x  | x   | x  | ✓  | x   | x  | ✓  | x   | x  | x  | x   | x  | ✓  | +    |
| TGF- $\beta$<br>[50 ng/mL]                    | ✓    | x  | x  | ✓  | x  | x  | x  | x  | x  | ✓   | x  | x  | ✓   | x  | x  | x   | ✓  | x  | ✓   | ✓  | x  | -    |
|                                               | x    | x  | x  | x  | x  | x  | x  | ✓  | x  | x   | ✓  | x  | x   | x  | x  | x   | x  | x  | x   | ✓  | x  | +    |
| DQ12<br>(0.2<br>$\mu$ g/cm <sup>2</sup> /day) | ✓    | ✓  | x  | ✓  | x  | x  | x  | ✓  | x  | x   | ✓  | x  | ✓   | ✓  | ✓  | x   | ✓  | x  | ✓   | ✓  | x  | -    |
|                                               | x    | ✓  | x  | x  | x  | ✓  | x  | x  | x  | x   | x  | ✓  | x   | x  | ✓  | ✓   | ✓  | x  | x   | x  | ✓  | +    |
| Nanocyl<br>(1 $\mu$ g/cm <sup>2</sup> /day)   | x    | x  | x  | ✓  | ✓  | x  | ✓  | ✓  | x  | ✓   | x  | x  | x   | x  | ✓  | x   | x  | ✓  | x   | ✓  | ✓  | -    |
|                                               | x    | x  | x  | x  | x  | x  | ✓  | ✓  | x  | x   | x  | x  | x   | x  | ✓  | x   | x  | x  | x   | x  | x  | +    |
| Mitsui-7<br>(1 $\mu$ g/cm <sup>2</sup> /day)  | x    | ✓  | x  | ✓  | ✓  | x  | ✓  | ✓  | x  | ✓   | ✓  | x  | ✓   | ✓  | x  | x   | ✓  | x  | x   | ✓  | x  | -    |
|                                               | x    | x  | x  | x  | x  | x  | x  | x  | x  | ✓   | x  | x  | ✓   | x  | x  | ✓   | x  | ✓  | x   | x  | ✓  | +    |
| Mitsui-7<br>(2 $\mu$ g/cm <sup>2</sup> /day)  | x    | ✓  | x  | ✓  | ✓  | x  | ✓  | ✓  | x  | x   | ✓  | x  | ✓   | ✓  | ✓  | x   | x  | x  | x   | ✓  | x  | -    |
|                                               | x    | x  | x  | ✓  | x  | x  | x  | ✓  | x  | x   | x  | x  | ✓   | x  | ✓  | x   | x  | x  | x   | ✓  | x  | +    |

X – not statistically significant (compared to negative control)

✓ - statistically significant (compared to negative control)

□ - statistical significance

(-) macrophages

(+) macrophages

### Supplementary table 7

Summary of statistical analysis of the obtained data of Collagen type 1 release from both tissues (with and without macrophages), x marks no statistically significant increase ( $p > 0.05$ ), ✓ marks statistically significant increase ( $p < 0.05$ ) compared to negative control. Untreated cells served as negative control for positive controls and DQ12 treated samples, while BSA-treated samples served as negative control for MWCNTs-treated cells. Data obtained in Laboratory 2.
